# Supplementary material
Source: ML conference proceedings conference paper supplement (https://openreview.net/forum?id=TRuqrVsmZK)
Supplement: supplementary_material [file attachment]

# Appendix

## A Updated Results for VTAB

Our BayesTune training for the VTAB benchmark has been in progress, and we report the latest results here in Table 3, which can replace our older version Table 2 in the main paper. Now, we can see that the number of datasets where BayesTune achieves Rank 1 is increased from 6 to 7, so becoming the best method among the competing approaches.

## B Chosen Hyperparameters

We grid-search hyperparameters on validation, where the two key hyperparameters are: the effective training data size  $\hat{N}$  and the noise discount factor  $\gamma$  (re: Sec. 4.1). The candidate sets are formed as:  $\hat{N} \in \{10^8, 10^9, \dots, 10^{12}\}$ ,  $\gamma \in \{10^{-4}, 10^{-2}, 10^0\}$  for NLP, and  $\hat{N} \in \{10^6, 10^7, \dots, 10^{12}\}$ ,  $\gamma \in \{10^{-4}, 10^{-3}, \dots, 10^0\}$  for VTAB. The chosen hyperparameters are as follows  $(\hat{N}, \gamma)$ : (NLP) cola =  $(11, 10^{-4})$ , stsb =  $(12, 10^{-4})$ , mrpc =  $(12, 10^0)$ , rte =  $(8, 10^{-4})$ , cb =  $(10, 10^{-4})$ , copa =  $(8, 10^{-2})$ , wsc =  $(10, 10^{-4})$ ; (VTAB) cifar100 =  $(7, 10^{-1})$ , caltech101 =  $(9, 10^{-2})$ , dtd =  $(12, 10^0)$ , flower102 =  $(12, 10^{-2})$ , pets =  $(12, 10^0)$ , svhn =  $(10, 10^0)$ , sun397 =  $(7, 10^{-1})$ , camelyon =  $(6, 10^0)$ , eurosat =  $(7, 10^{-1})$ , resisc45 =  $(12, 10^{-2})$ , retinopathy =  $(7, 10^{-2})$ , clevr-count =  $(7, 10^{-3})$ , clevr-dist =  $(7, 10^{-3})$ , dmlab =  $(8, 10^0)$ , kitti =  $(7, 10^0)$ , dsprite-loc =  $(12, 10^{-4})$ , dsprite-ori =  $(12, 10^{-3})$ , snorb-azim =  $(7, 10^{-2})$ , snorb-ele =  $(6, 10^{-1})$ .

## C More Analysis

**(NLP) Test accuracies at other sparsity levels.** Although  $p = 0.005$  is recognized as the optimal sparsity level overall for the GLUE and SuperGLUE tasks, we evaluate the test performance of our BayesTune for different sparsity levels:  $p \in \{0.01, 0.05, 0.1, 0.2, 0.3, 0.5\}$ . The average test accuracies are shown in Fig. 4. We see that overall there is less significant change in test performance so long as the sparsity level  $p$  is small enough, and the resulting sparse updates selected by our BayesTune lead to equally good performance as those with the default value. However, increasing  $p$  further (e.g.,  $p = 0.5$ ) considerably degrades the performance, which signifies the importance of sparse fine-tuning to avoid potential overfitting.

**(VTAB) Scale posterior mean  $\hat{\lambda}$  vs. sparsity level  $p$ .** We visualize the plots that relate the sorted scale posterior means  $\hat{\lambda}$  to the sparsity levels  $p$  in Fig. 5. The plots are aligned with the the test accuracy plots analyzed in the main paper. As the plots are grouped along the optimal sparsity values, we see certain trends: for the *sparse group* (sun397 and cifar100), the scale  $\hat{\lambda}$  values are overall small scaled (in the range of  $[0, 0.2]$ ) with sharp drops at small  $\hat{\lambda}$ ; for the *dense group*: (camelyon and dmlab),  $\hat{\lambda}$  scale is even larger (in the range of  $[0, 0.5]$ ) with relatively smooth decaying at small values; lastly for the *in-between group* (clever-dist, dspr-ori, kitti, and snorb-ele), we have much narrower  $\hat{\lambda}$  ranges in between 0 and 0.1 except for kitti.

| Method           | #param (M)  | Cifar100      | Caltech101    | DTD           | Flower102            | Pets                 | SVHN                 | Sun397        | Camelyon      | EuroSAT       | Resisc45      | Retinopathy          | Clevr-Count   | Clevr-Dist    | DMLab         | KITTI                | dSpr-Loc             | dSpr-Ori             | sNORB-Azim    | sNORB-Ele     | Avg Rank ( $\downarrow$ ) | # Rank 1 ( $\uparrow$ ) |
|------------------|-------------|---------------|---------------|---------------|----------------------|----------------------|----------------------|---------------|---------------|---------------|---------------|----------------------|---------------|---------------|---------------|----------------------|----------------------|----------------------|---------------|---------------|---------------------------|-------------------------|
| Full update      | 85.8        | 68.9          | 87.7          | 64.3          | 87.2                 | 86.9                 | 87.4                 | 38.8          | 79.7          | 95.7          | 84.2          | 73.9                 | 56.3          | 58.6          | 41.7          | 65.5                 | 57.5                 | 46.7                 | 25.7          | 29.1          |                           |                         |
| Linear           | 0.04        | 64.4          | 85.0          | 63.2          | 97.0                 | 86.3                 | 36.6                 | 51.0          | 78.5          | 87.5          | 68.5          | 74.0                 | 34.3          | 30.6          | 33.2          | 55.4                 | 12.5                 | 20.0                 | 9.6           | 19.2          |                           |                         |
| VPT [17]         | 0.64        | <b>78.8</b>   | 90.8          | 65.8          | 98.0                 | 88.3                 | 78.1                 | 49.6          | 81.8          | <b>96.1</b>   | 83.4          | 68.4                 | 68.5          | 60.0          | 46.5          | 72.8                 | 73.6                 | 47.9                 | <b>32.9</b>   | 37.8          | 4.16                      | 3                       |
| Adapter [15]     | 0.16        | 69.2          | 90.1          | 68.0          | 98.8                 | 89.9                 | 82.8                 | <b>54.3</b>   | 84.0          | 94.9          | 81.9          | 75.5                 | 80.9          | 65.3          | 48.6          | 78.3                 | 74.8                 | 48.5                 | 29.9          | 41.6          | 3.68                      | 1                       |
| LoRA [16]        | 0.29        | 67.1          | 91.4          | 69.4          | 98.8                 | 90.4                 | 85.3                 | 54.0          | <b>84.9</b>   | 95.3          | <b>84.4</b>   | 73.6                 | <b>82.9</b>   | <b>69.2</b>   | 49.8          | 78.5                 | 75.7                 | 47.1                 | 31.0          | 44.0          | 2.68                      | 4                       |
| NOAH [36]        | 0.43        | 69.6          | <b>92.7</b>   | <b>70.2</b>   | <b>99.1</b>          | 90.4                 | 86.1                 | 53.7          | 84.4          | 95.4          | 83.9          | 75.8                 | 82.8          | 68.9          | <b>49.9</b>   | 81.7                 | 81.8                 | 48.3                 | 32.8          | <b>44.2</b>   | <b>1.95</b>               | 5                       |
| <b>BayesTune</b> | Avg<br>0.37 | 68.9<br>(.07) | 92.6<br>(.37) | 69.5<br>(.04) | <b>99.1</b><br>(.37) | <b>90.8</b><br>(.15) | <b>88.1</b><br>(.67) | 50.0<br>(.04) | 84.6<br>(.60) | 95.8<br>(.60) | 82.8<br>(.37) | <b>76.0</b><br>(.07) | 82.6<br>(.30) | 67.4<br>(.22) | 49.6<br>(.52) | <b>82.3</b><br>(.60) | <b>81.9</b><br>(.60) | <b>49.9</b><br>(.30) | 22.6<br>(.52) | 39.3<br>(.67) | 2.37                      | <b>7</b>                |

Table 3: **(Latest)** VTAB-1K results. The accuracies at the optimal sparsity levels are reported for our BayesTune. For BayesTune, the optimal number of the updated parameters is dataset-dependent, and these optimal numbers are depicted in the parentheses. The figures of the competing methods are excerpted from [17, 15, 16, 36].

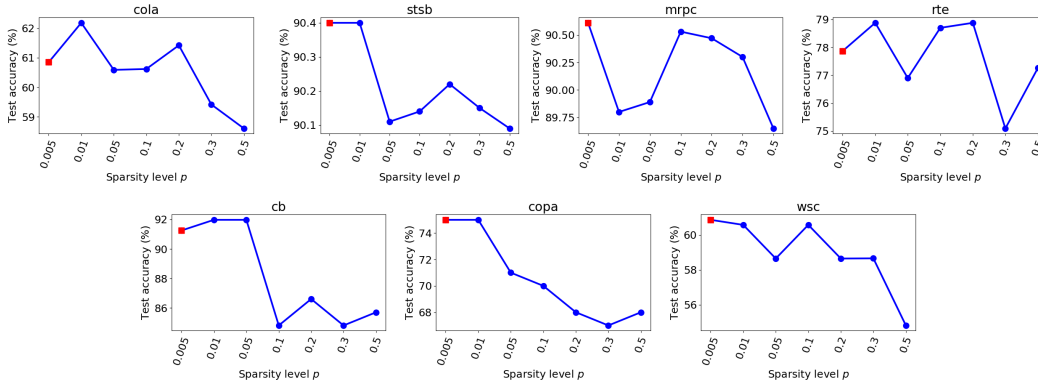

Figure 4: (NLP benchmarks) Test accuracies at sparsity levels other than the default  $p = 0.005$ . We evaluate the BayesTune sparse update models with  $p \in \{0.01, 0.05, 0.1, 0.2, 0.3, 0.5\}$ , where the default ones  $p = 0.005$  are shown as red square markers.

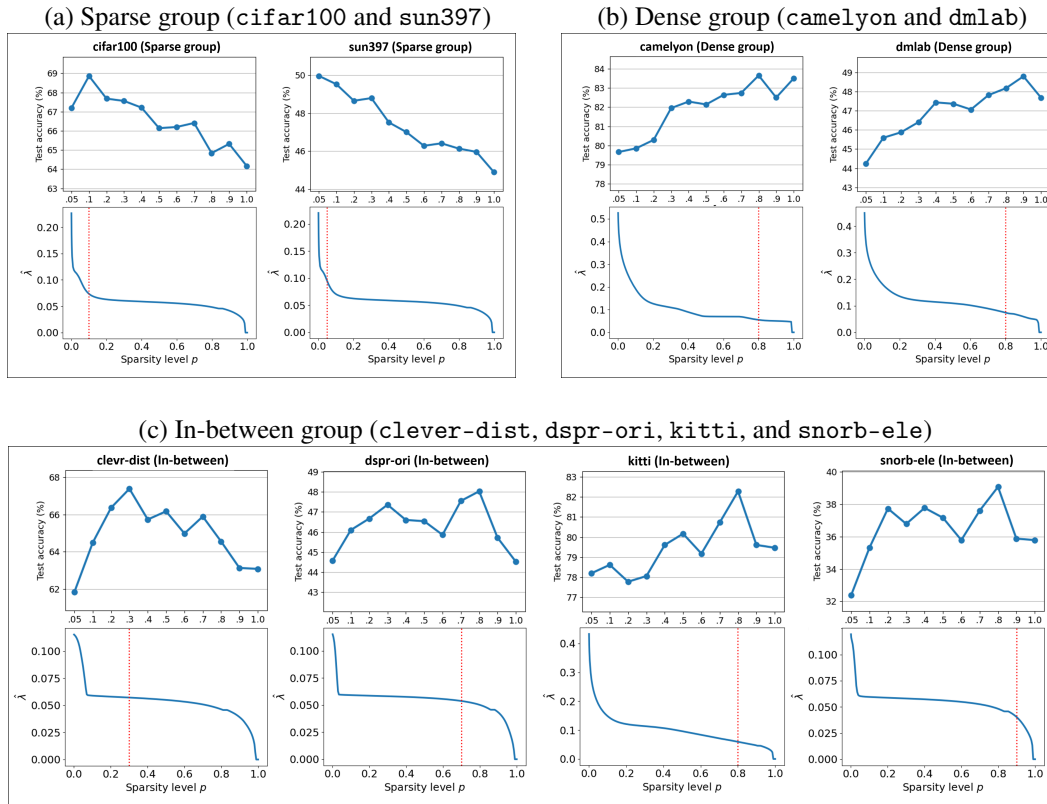

Figure 5: (VTAB benchmarks) The plots of the sorted scale posterior means  $\hat{\lambda}$  vs. sparsity levels  $p$ , each of which is aligned with the corresponding test accuracy plot. The plots are grouped along the optimal sparsity values where each group exhibits similar trends.

## 442 D Layer-wise and Module-wise Sparsity Patterns of BayesTuned Networks

443 **Sparsity patterns of RoBERTa-base on NLP tasks.** We visualize the module-wise and layer-wise sparsity  
444 patterns of the BayesTuned RoBERTa-base networks on 7 NLP tasks in Fig. 6–19. First, for the layer-wise  
445 sparsity pattern: (Except for *mrpc*) The proportions of the selected updatable parameters are more or less  
446 uniformly distributed across the 12 layers of the Transformer, while the first word embedding layer and the last  
447 classification layer are significantly less and more selected, respectively. This is intuitively appealing as the  
448 task-specific features may tend to be determined at the higher, more global levels in texts/sentences, to account  
449 for longer-range dependency. Next, looking at the module-wise sparsity patterns, the proportions are highly  
450 non-uniform, layer-specific, and also task/dataset-dependent. For instance, the bias modules in some layers are

451 very densely selected, while they are very sparsely selected in other layers. This shows clear discrepancy to the  
452 heuristic strategies like BitFit [34] in which the bias modules are selected 100% for all layers.

453 **Sparsity patterns of ViT-B/16 on VTAB vision tasks.** The module-wise and layer-wise sparsity patterns of the  
454 BayesTuned ViT-B/16 networks on VTAB benchmark datasets are shown in Fig. 20–38. We also superimpose  
455 the optimal  $p$  values (dataset dependent). The resulting patterns are quite similar to the NLP case: Except for a  
456 few cases, the lowest level visual prompt layers are selected far less, sometimes ignored, compared to the later  
457 layers. The last linear classification head, although not shown here in the sparsity diagrams, is selected 100%.  
458 Overall the layer-wise selection patterns are nearly uniform while the module-wise selection patterns are highly  
459 non-uniform and dataset dependent.

## cola (Module-wise sparsity pattern)

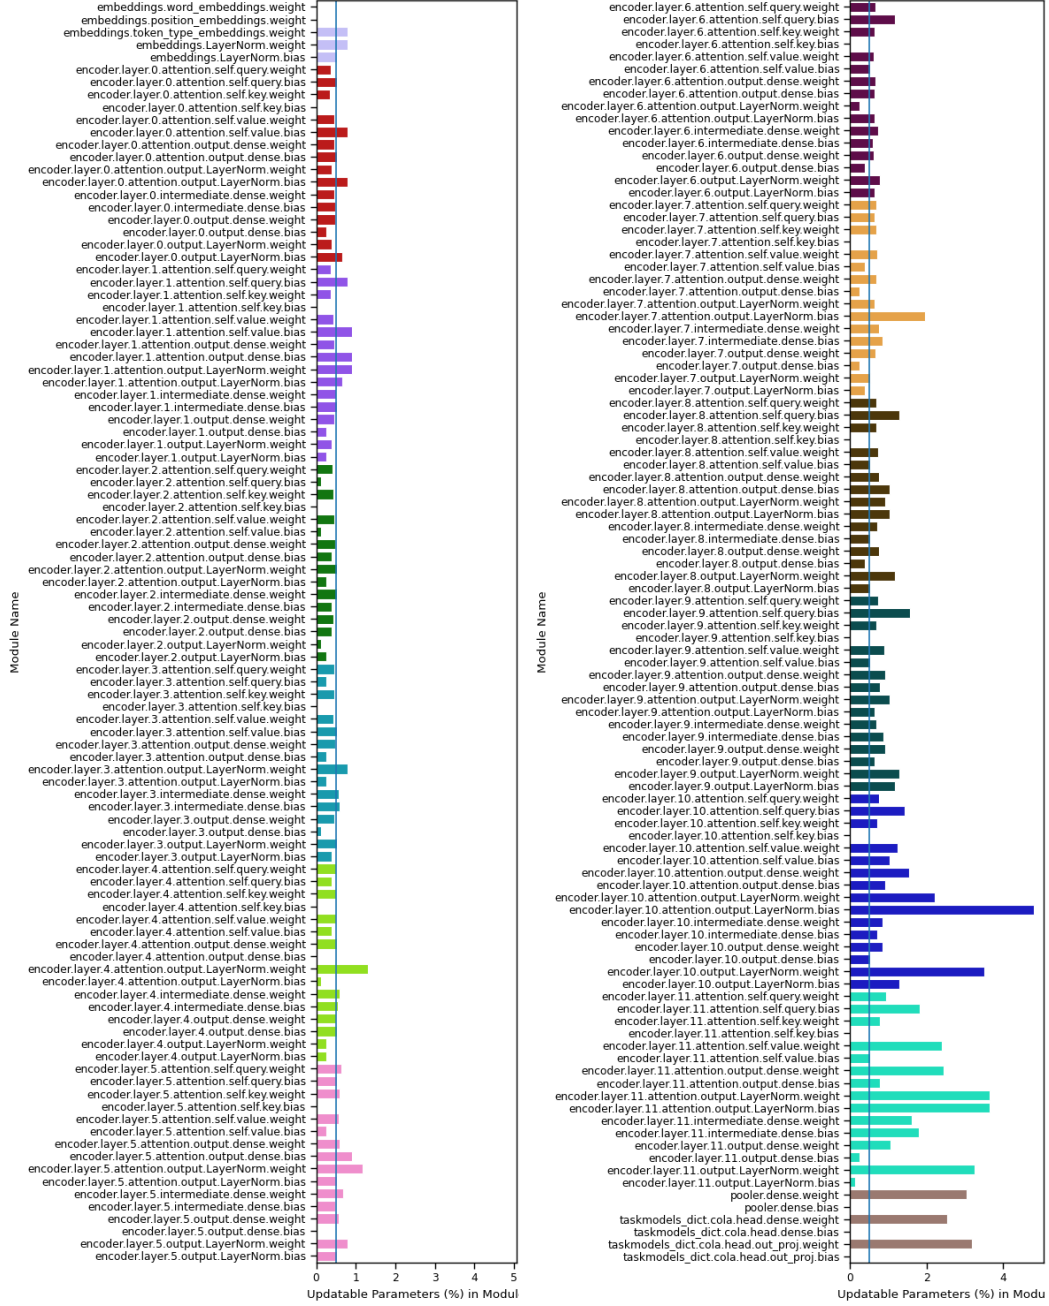

Figure 6: Sparsity pattern of the modules in RoBERTa-base on cola. Module-wise updatable parameters (%). (Left) The first half of the network and (Right) the second half. The default sparsity level  $p^* = 0.5\%$  is shown as vertical line.

## cola (Layer-wise sparsity pattern)

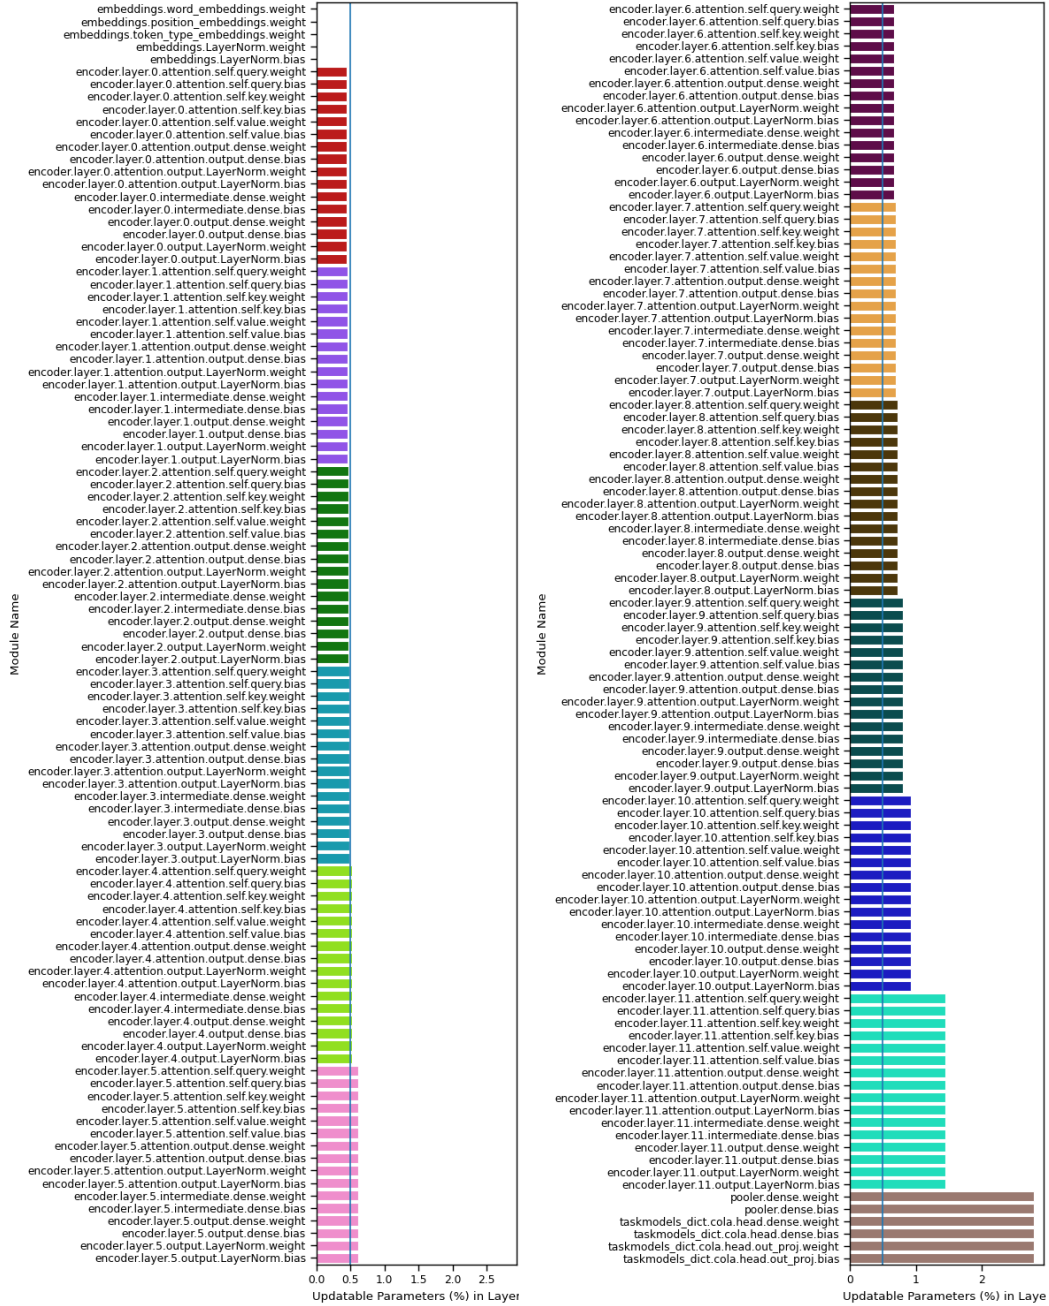

Figure 7: Sparsity pattern of the layers in RoBERTa-base on cola. Layer-wise updatable parameters (%). (Left) The first half of the network and (Right) the second half. The default sparsity level  $p^* = 0.5\%$  is shown as vertical line.

## stsb (Module-wise sparsity pattern)

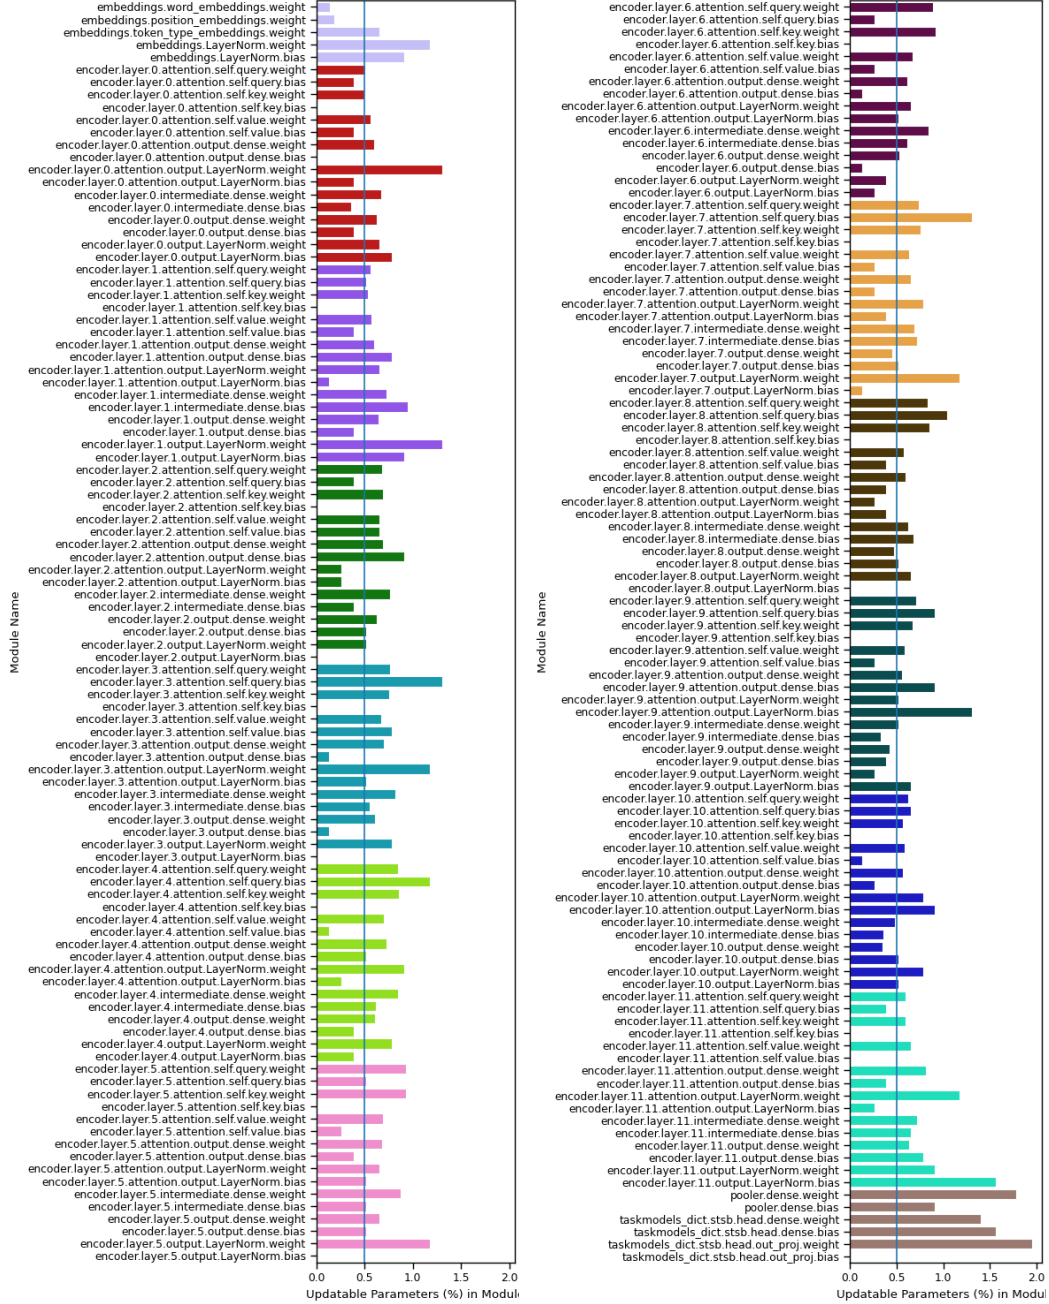

Figure 8: Sparsity pattern of the modules in RoBERTa-base on stsb. Module-wise updatable parameters (%). (Left) The first half of the network and (Right) the second half. The default sparsity level  $p^* = 0.5\%$  is shown as vertical line.



stsb (**Layer-wise** sparsity pattern)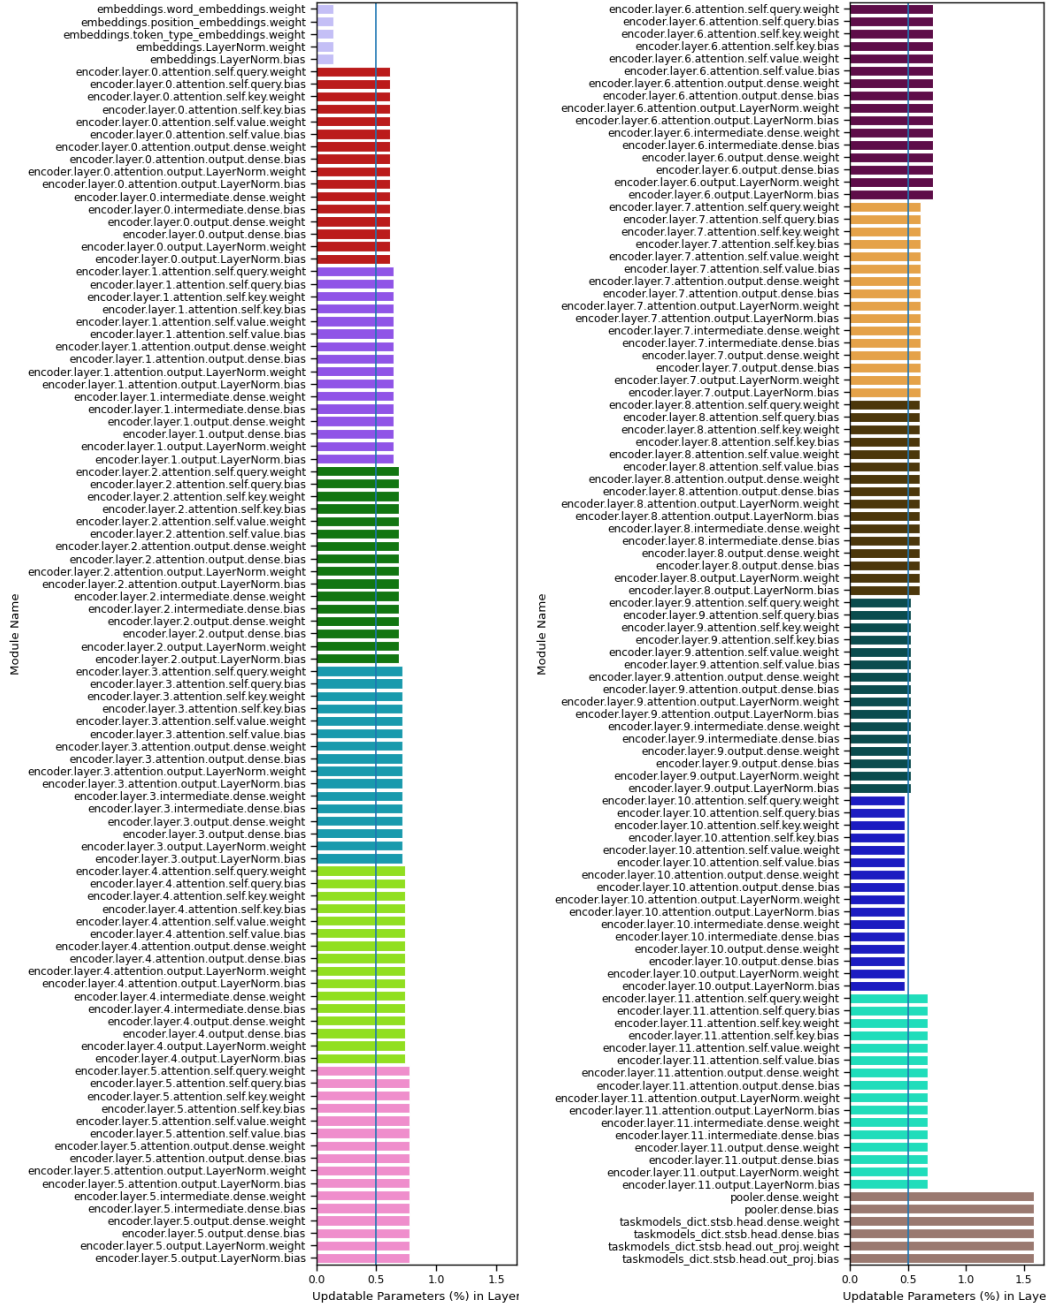

Figure 9: Sparsity pattern of the layers in RoBERTa-base on sts<sub>b</sub>. Layer-wise updatable parameters (%). (Left) The first half of the network and (Right) the second half. The default sparsity level  $p^* = 0.5\%$  is shown as vertical line.

## mrpc (Module-wise sparsity pattern)

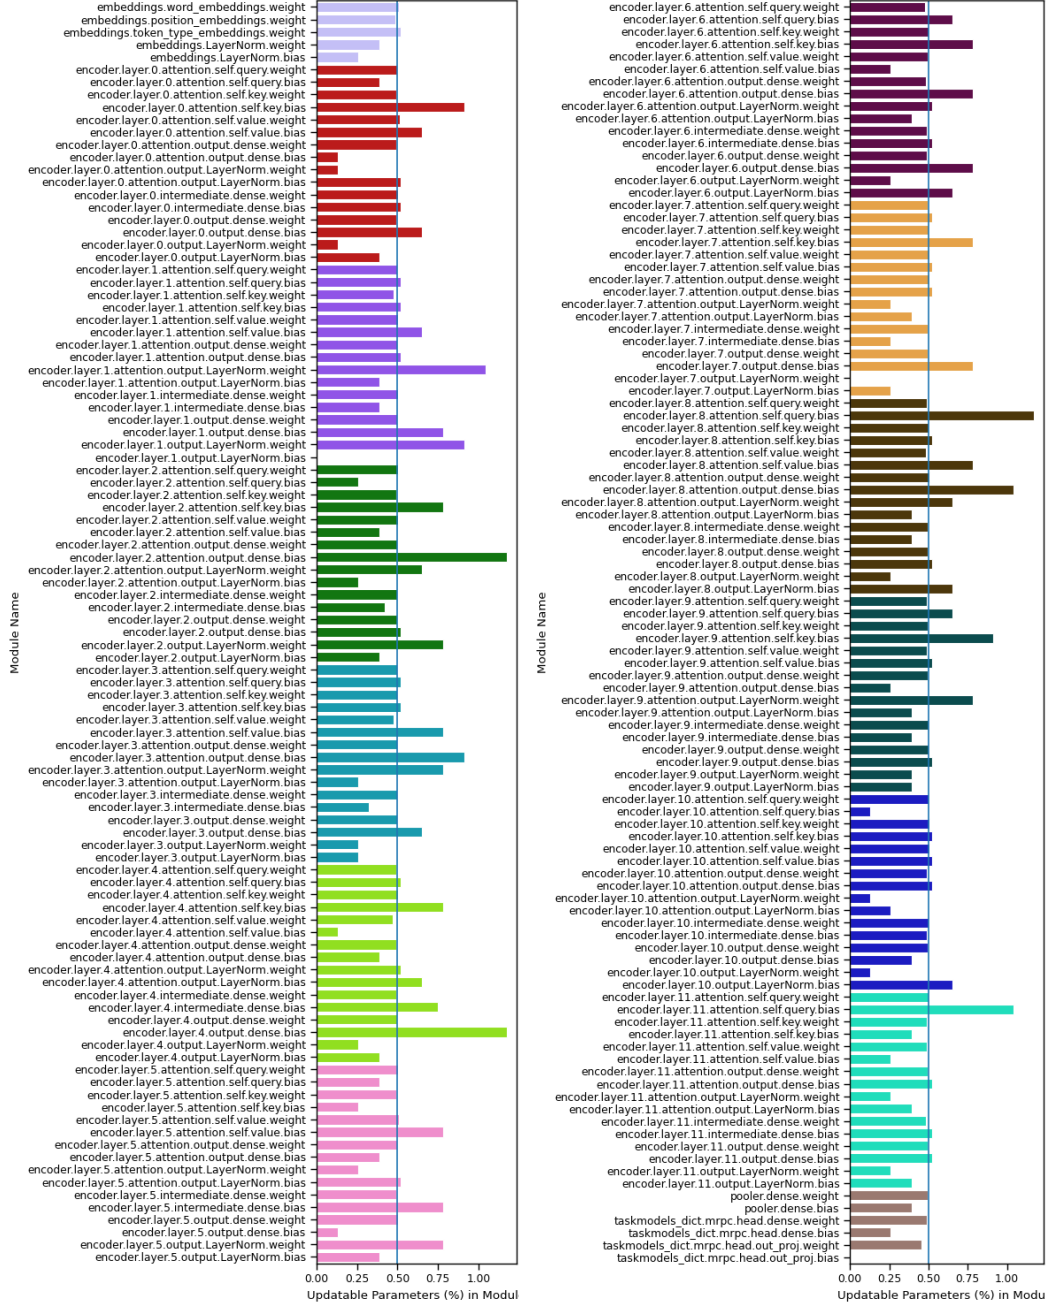

Figure 10: Sparsity pattern of the modules in RoBERTa-base on mrpc. Module-wise updatable parameters (%). (Left) The first half of the network and (Right) the second half. The default sparsity level  $p^* = 0.5\%$  is shown as vertical line.



mrpc (**Layer-wise** sparsity pattern)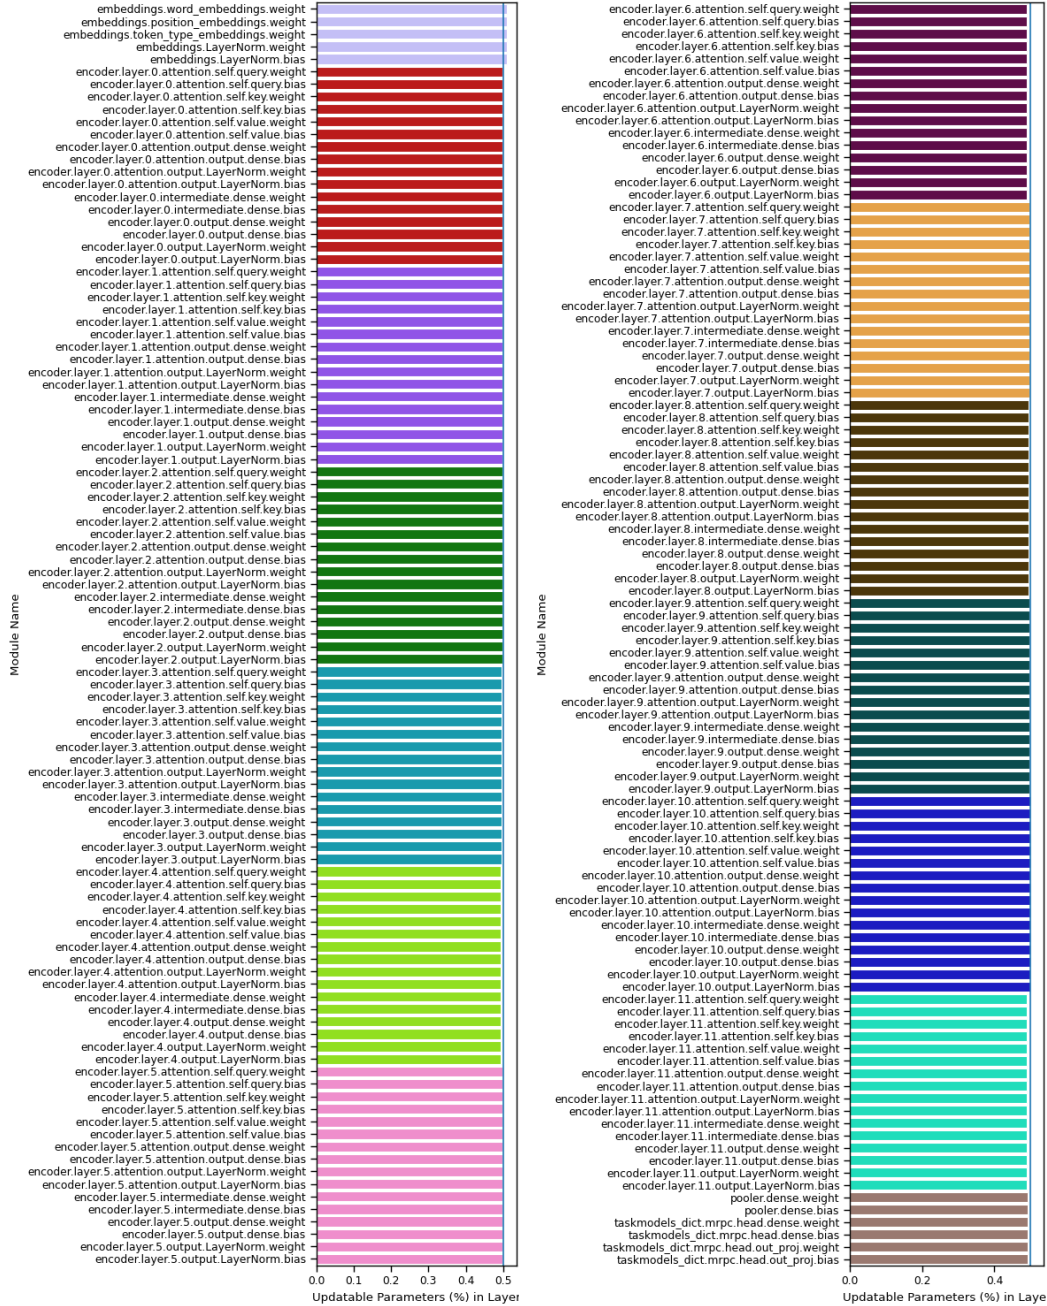

Figure 11: Sparsity pattern of the layers in RoBERTa-base on mrpc. Layer-wise updatable parameters (%). (Left) The first half of the network and (Right) the second half. The default sparsity level  $p^* = 0.5\%$  is shown as vertical line.

## rte (Module-wise sparsity pattern)

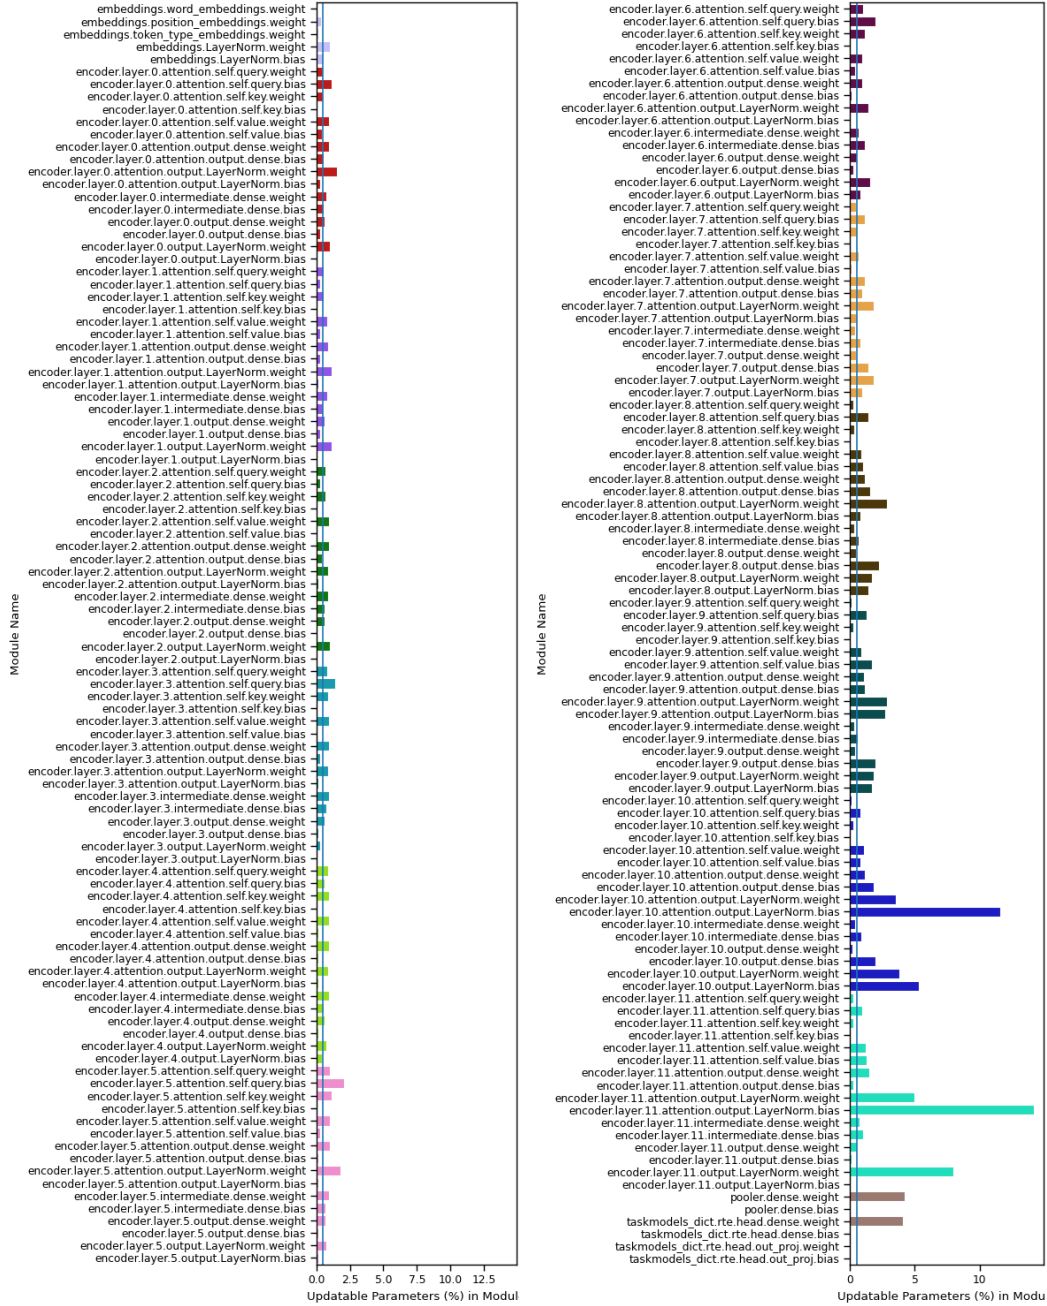

Figure 12: Sparsity pattern of the modules in RoBERTa-base on rte. Module-wise updatable parameters (%). (Left) The first half of the network and (Right) the second half. The default sparsity level  $p^* = 0.5\%$  is shown as vertical line.

rte (**Layer-wise** sparsity pattern)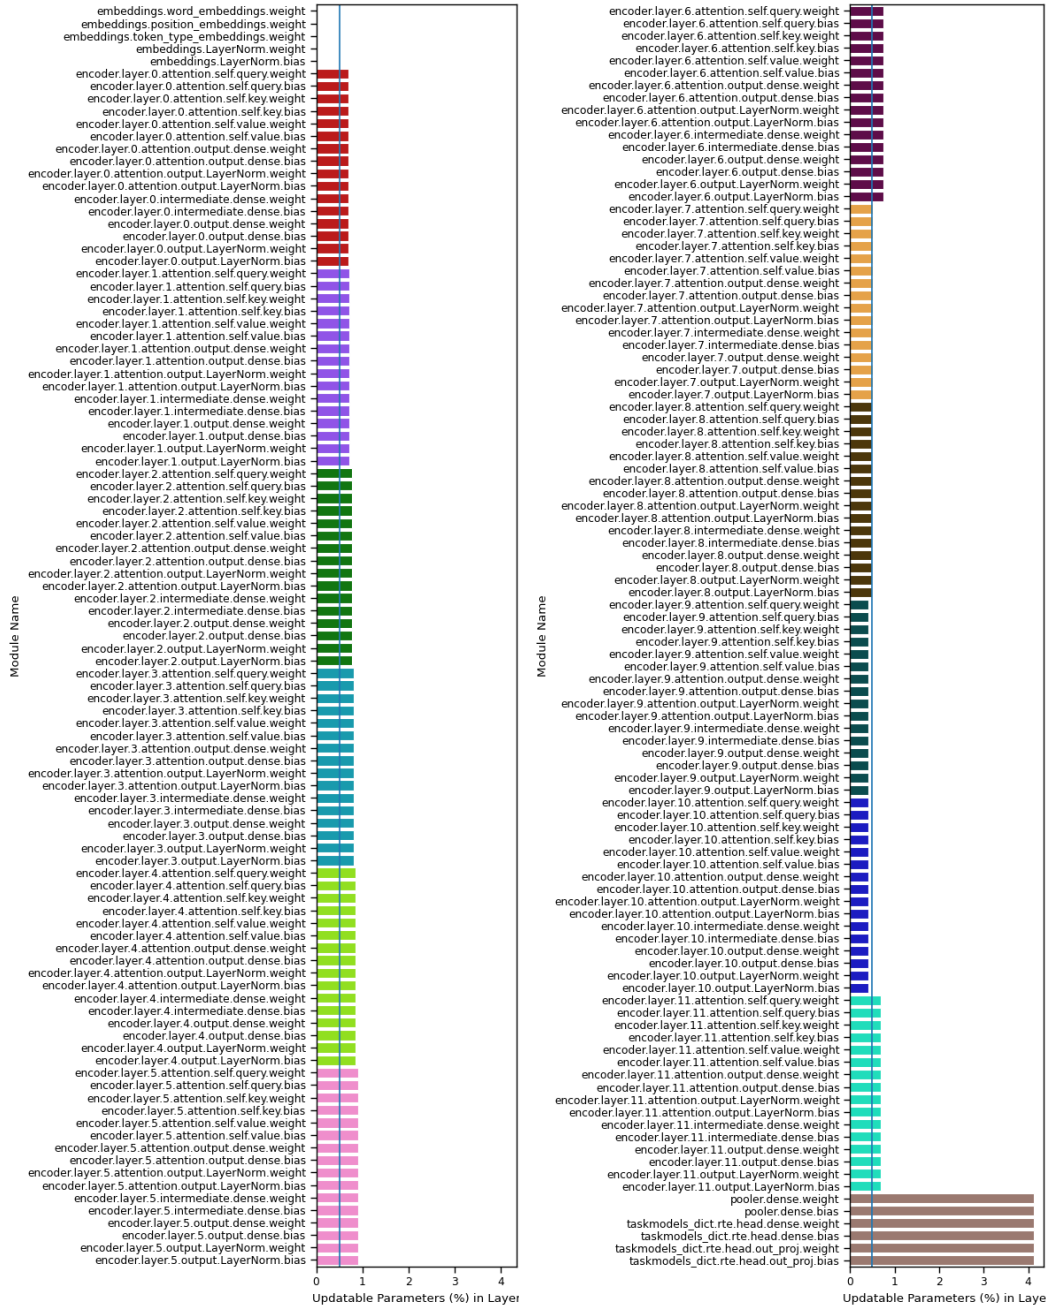

Figure 13: Sparsity pattern of the layers in RoBERTa-base on `rte`. Layer-wise updatable parameters (%). (Left) The first half of the network and (Right) the second half. The default sparsity level  $p^* = 0.5\%$  is shown as vertical line.

cb (**Module-wise** sparsity pattern)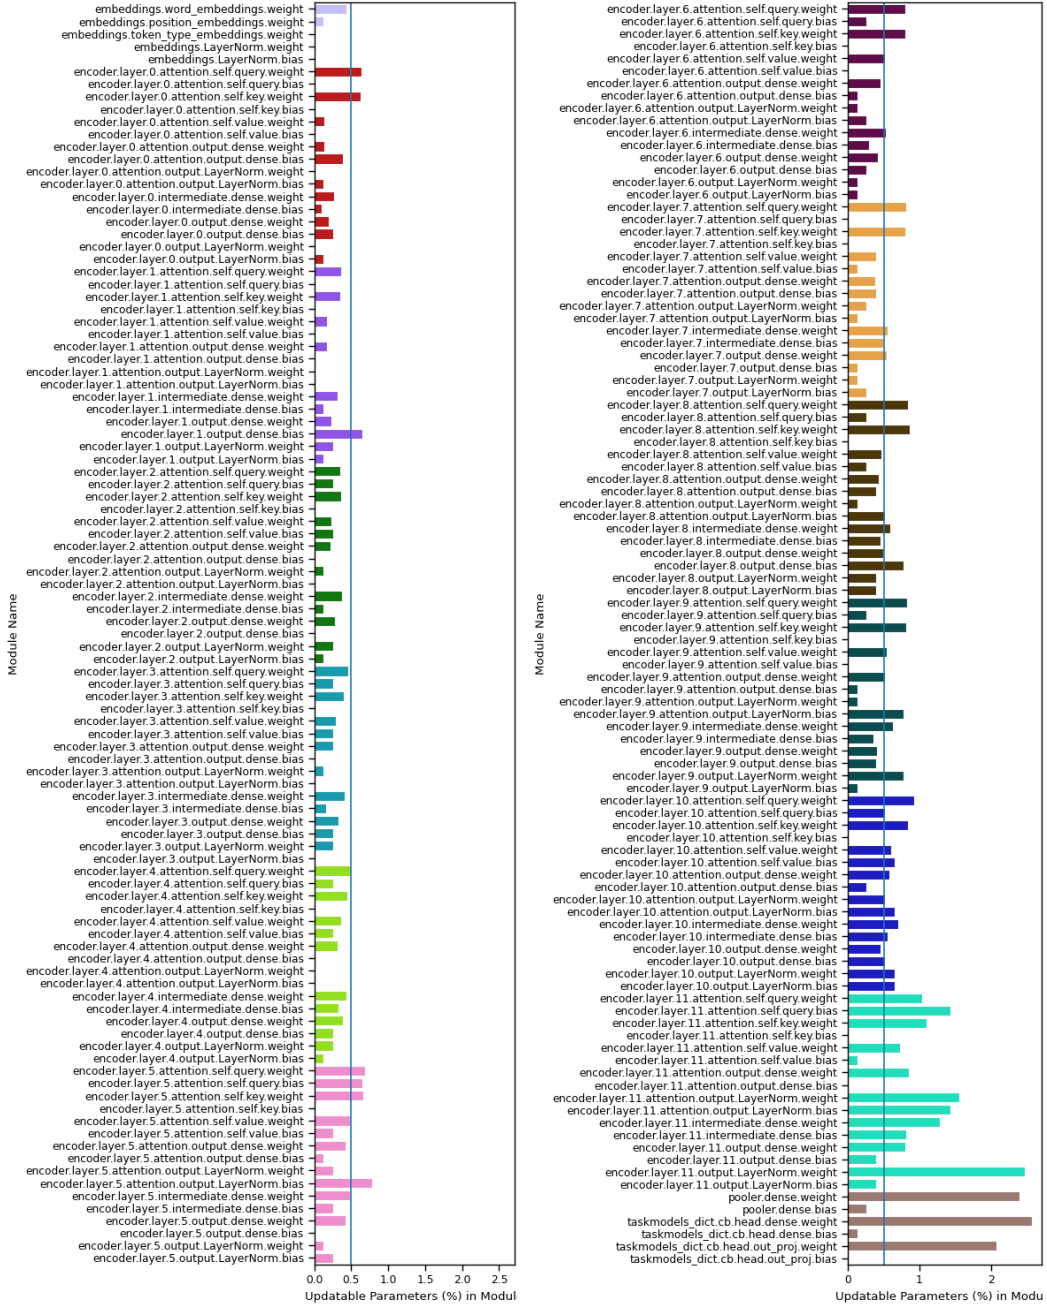

Figure 14: Sparsity pattern of the modules in RoBERTa-base on cb. Module-wise updatable parameters (%). (Left) The first half of the network and (Right) the second half. The default sparsity level  $p^* = 0.5\%$  is shown as vertical line.



cb (Layer-wise sparsity pattern)

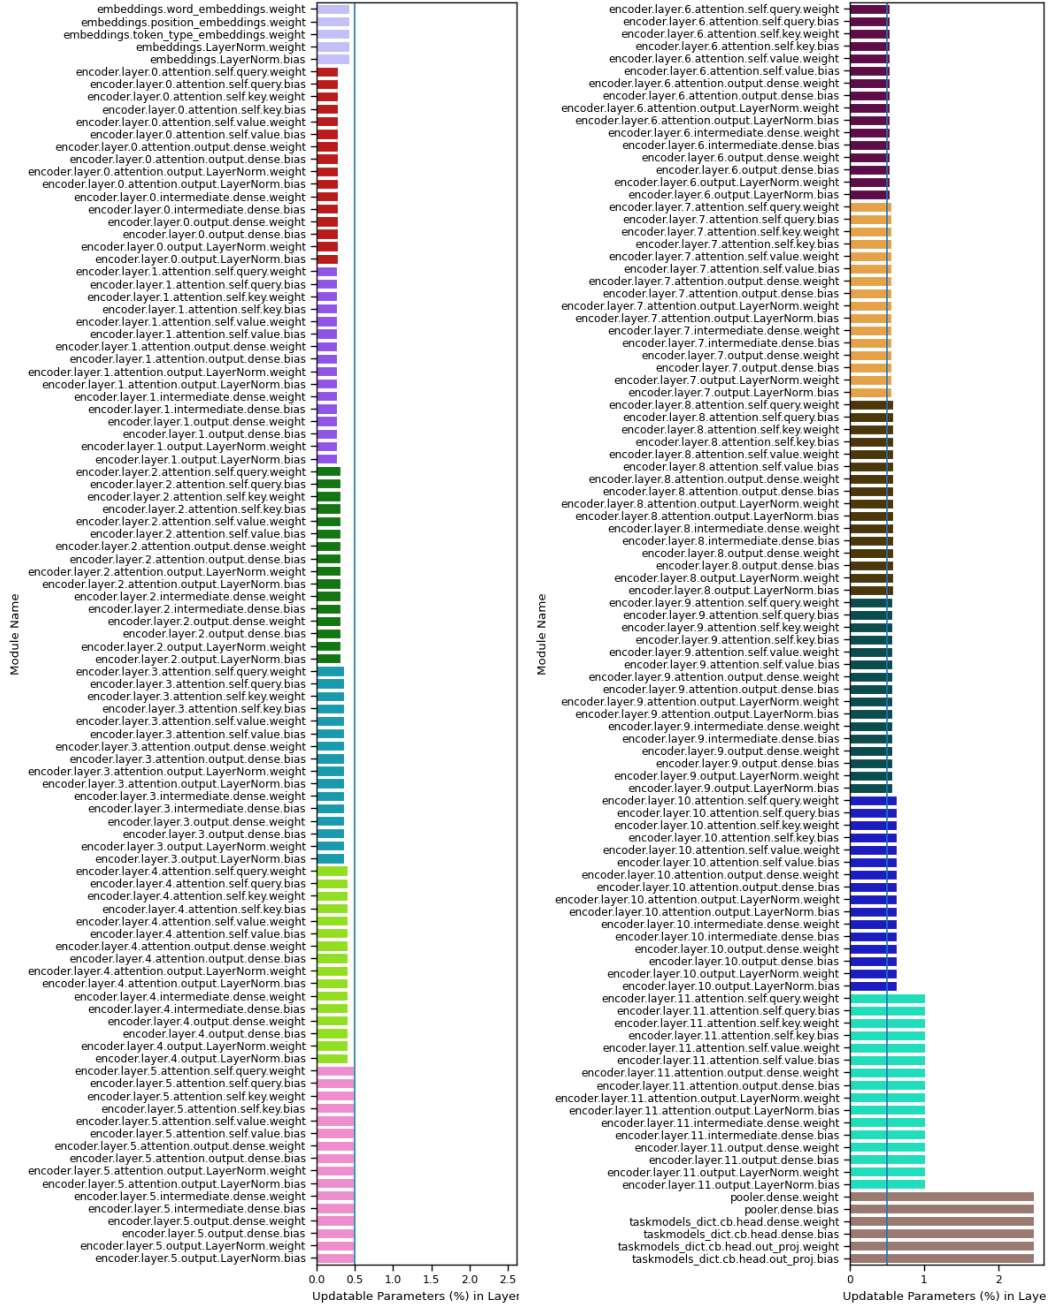

Figure 15: Sparsity pattern of the layers in RoBERTa-base on cb. Layer-wise updatable parameters (%). (Left) The first half of the network and (Right) the second half. The default sparsity level  $p^* = 0.5\%$  is shown as vertical line.



copa (Module-wise sparsity pattern)

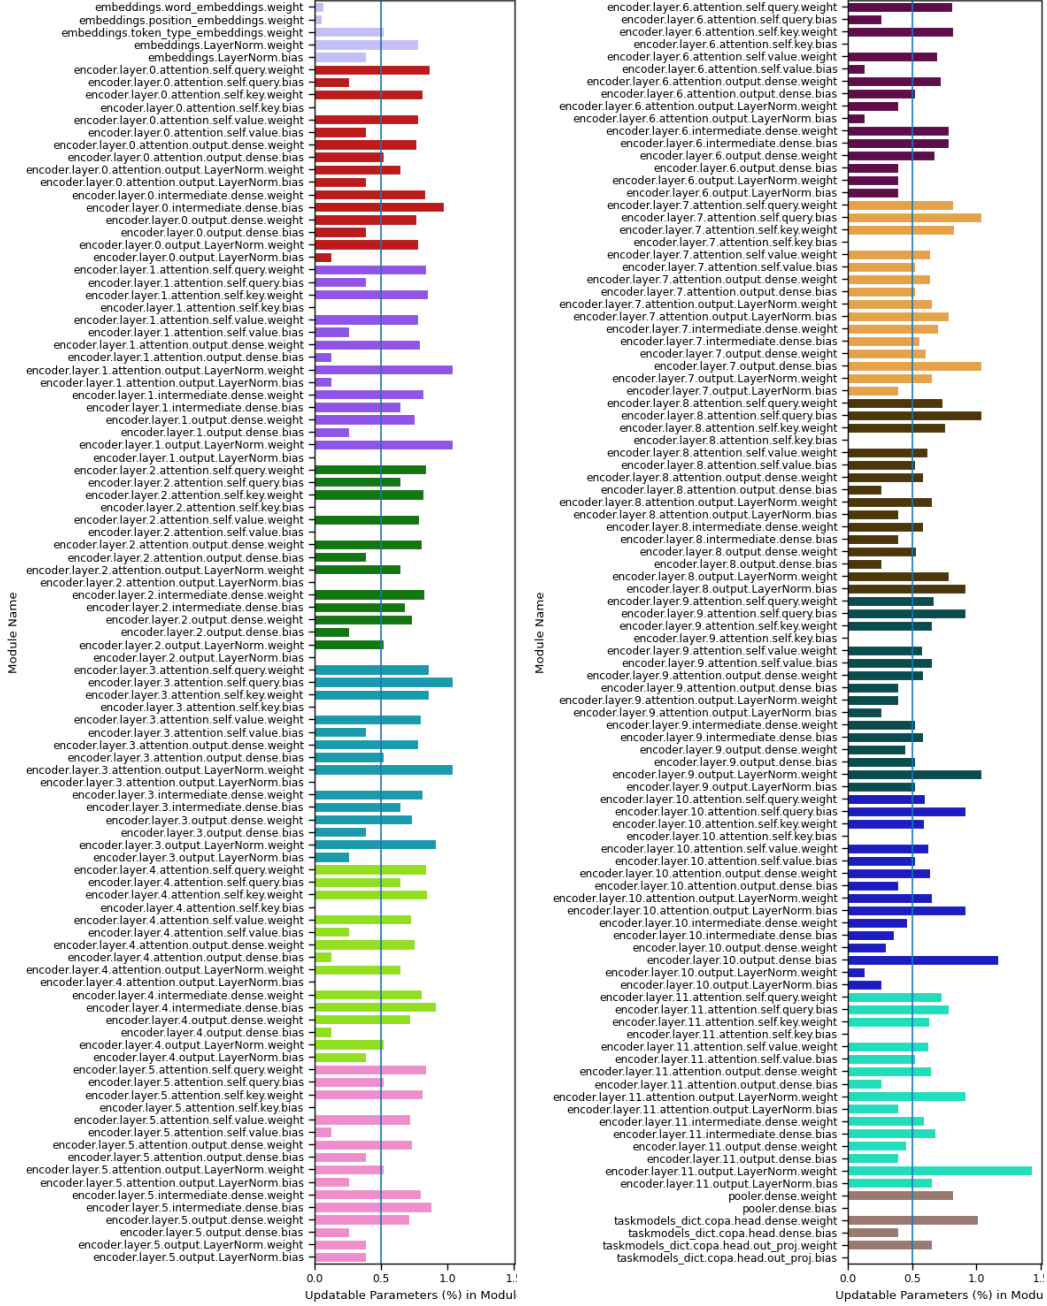

Figure 16: Sparsity pattern of the modules in RoBERTa-base on copa. Module-wise updatable parameters (%). (Left) The first half of the network and (Right) the second half. The default sparsity level  $p^* = 0.5\%$  is shown as vertical line.

## copa (Layer-wise sparsity pattern)

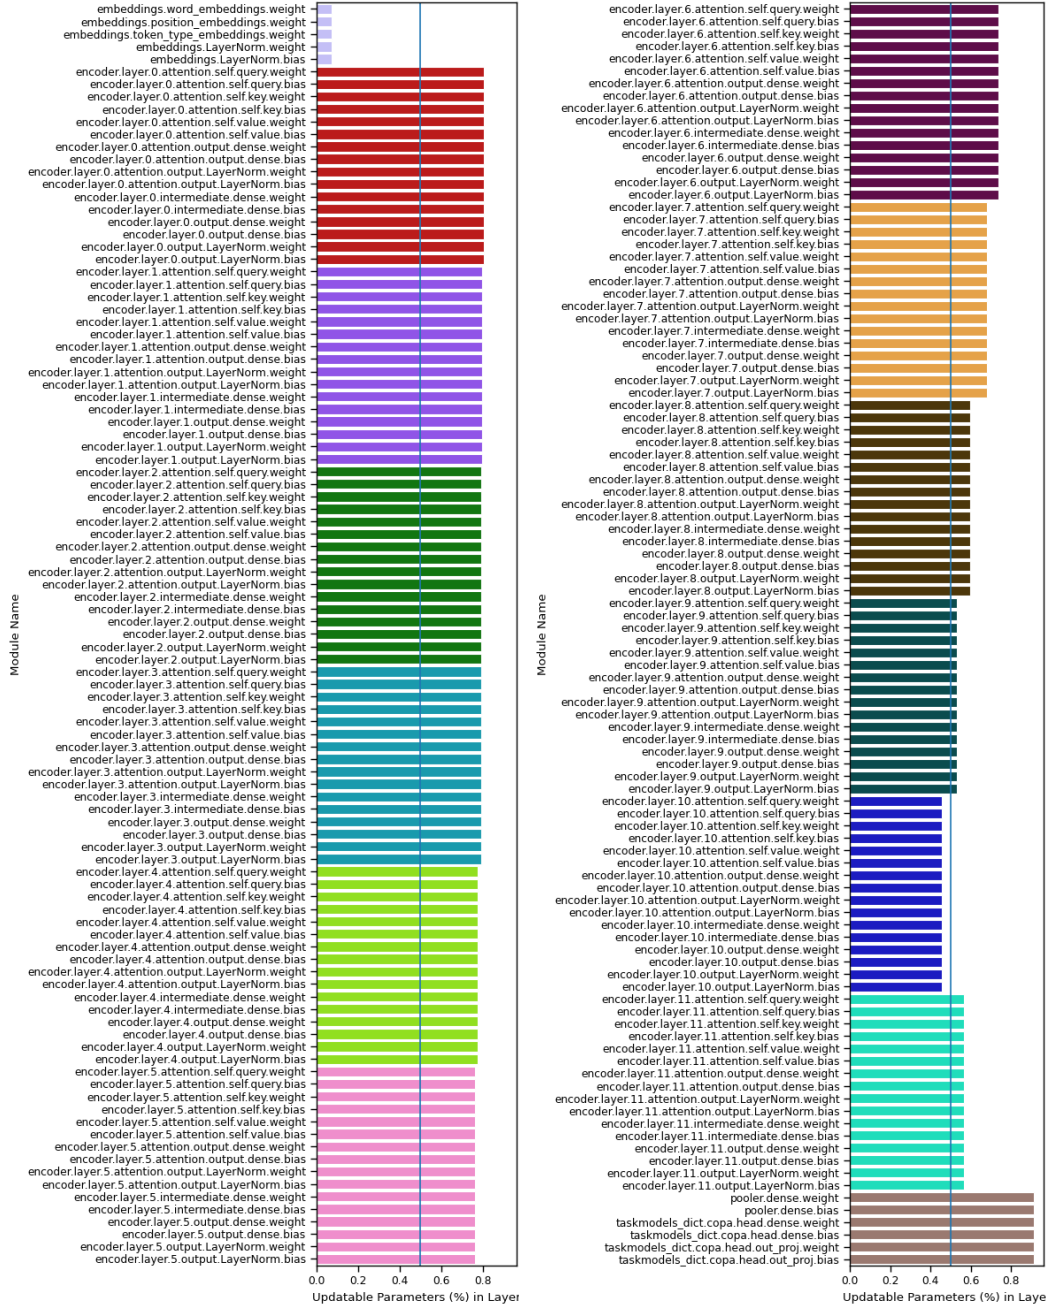

Figure 17: Sparsity pattern of the layers in RoBERTa-base on copa. Layer-wise updatable parameters (%). (Left) The first half of the network and (Right) the second half. The default sparsity level  $p^* = 0.5\%$  is shown as vertical line.

## wsc (Module-wise sparsity pattern)

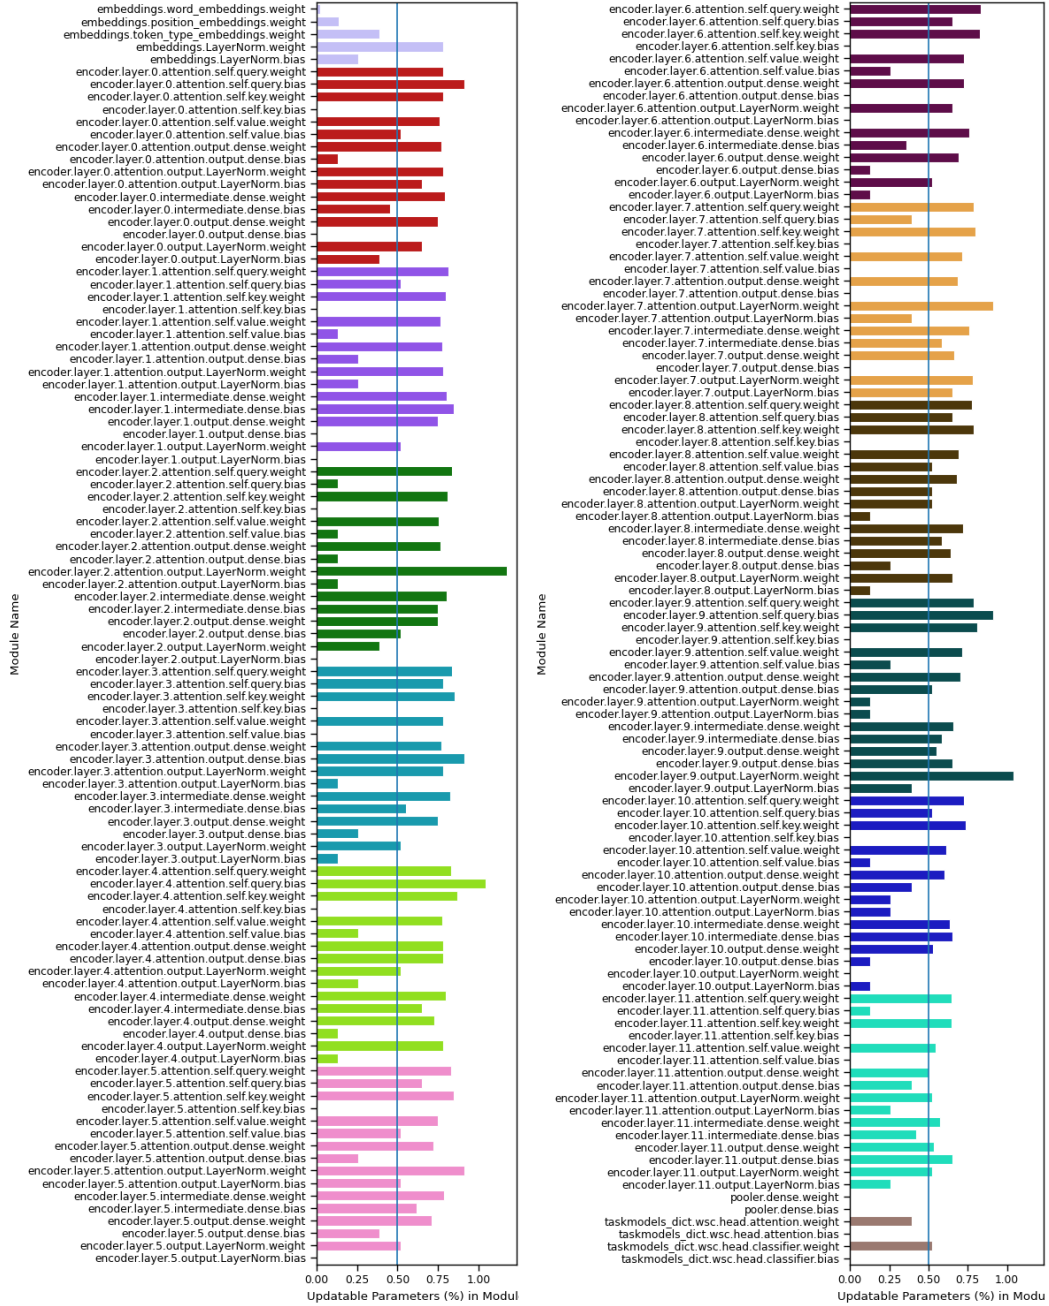

Figure 18: Sparsity pattern of the modules in RoBERTa-base on wsc. Module-wise updatable parameters (%). (Left) The first half of the network and (Right) the second half. The default sparsity level  $p^* = 0.5\%$  is shown as vertical line.

## wsc (Layer-wise sparsity pattern)

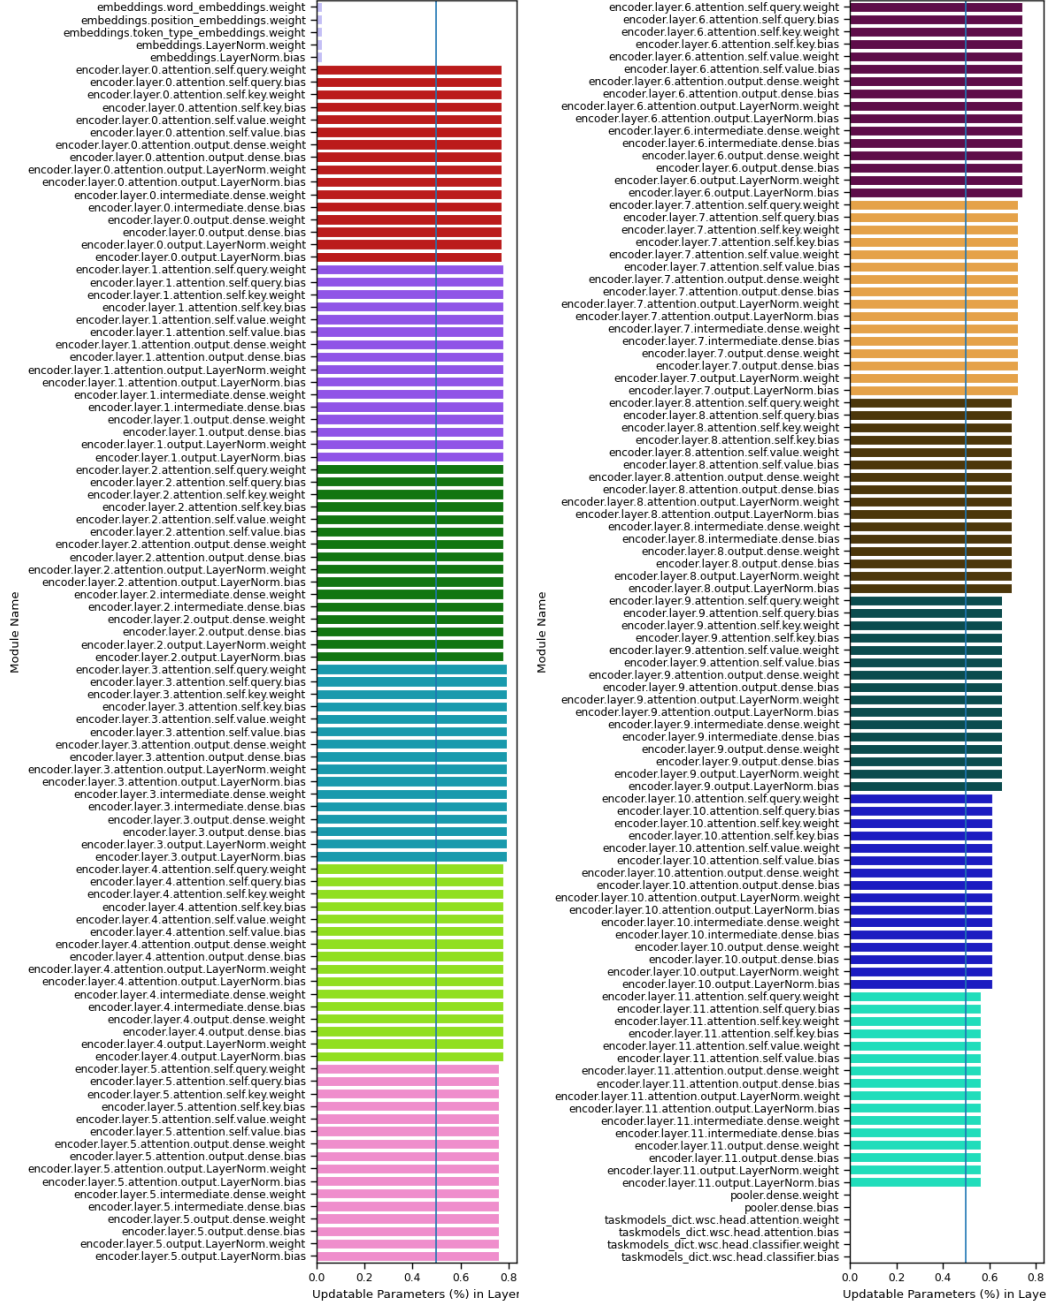

Figure 19: Sparsity pattern of the layers in RoBERTa-base on wsc. Layer-wise updatable parameters (%). (Left) The first half of the network and (Right) the second half. The default sparsity level  $p^* = 0.5\%$  is shown as vertical line.



# cifar100

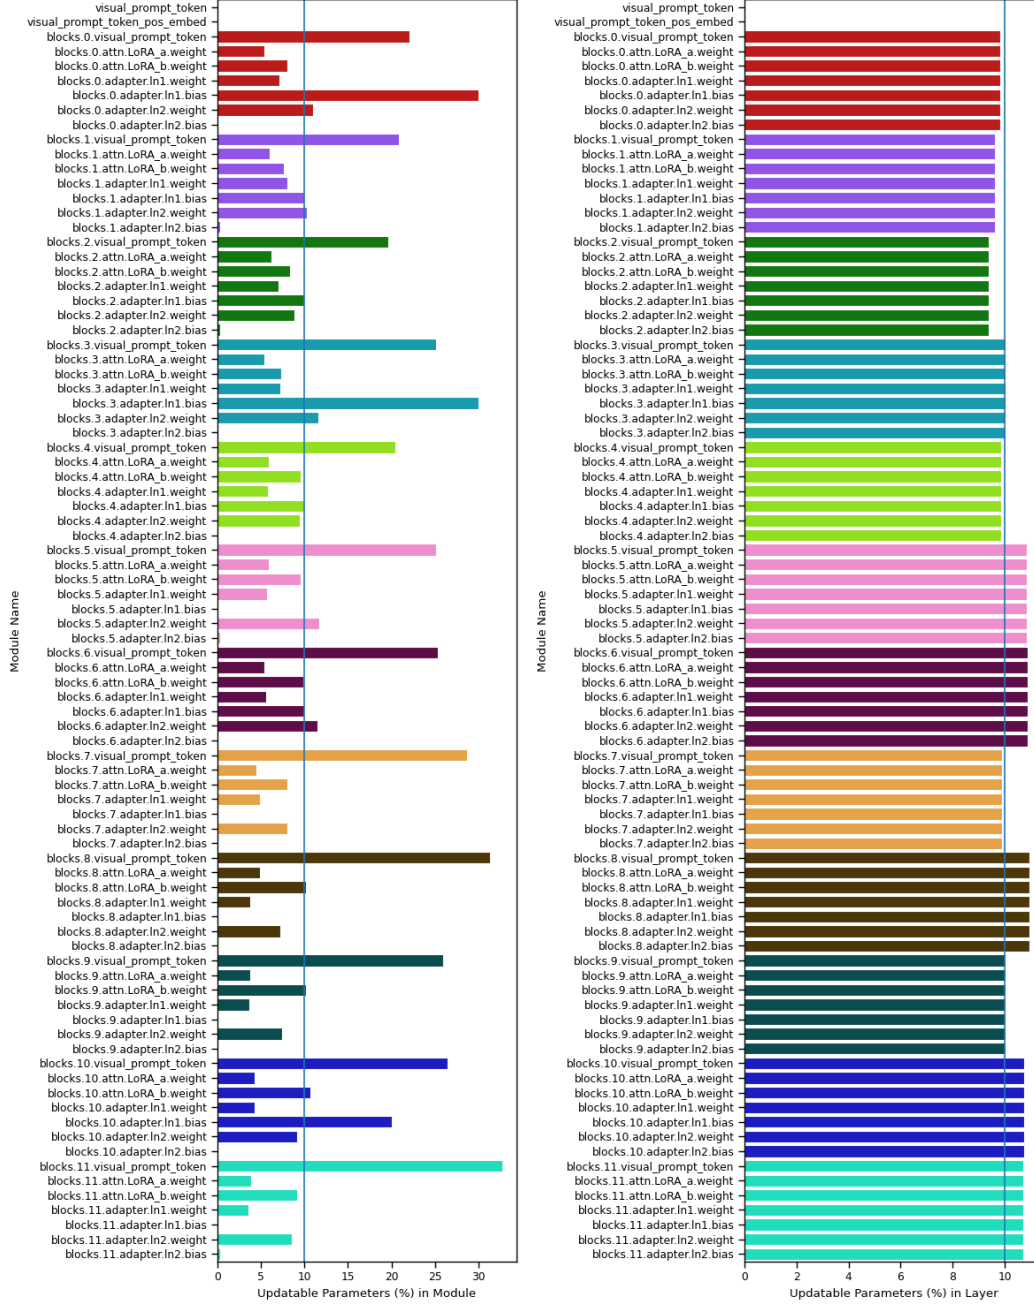

Figure 20: Sparsity pattern of attached modules to ViT-B/16 on cifar100. (Left) Module-wise updatable parameters (%) and (Right) Layer-wise updatable parameters (%). The BayesTune’s optimal sparsity level  $p^* = 10\%$  is shown as vertical line.



# caltech101

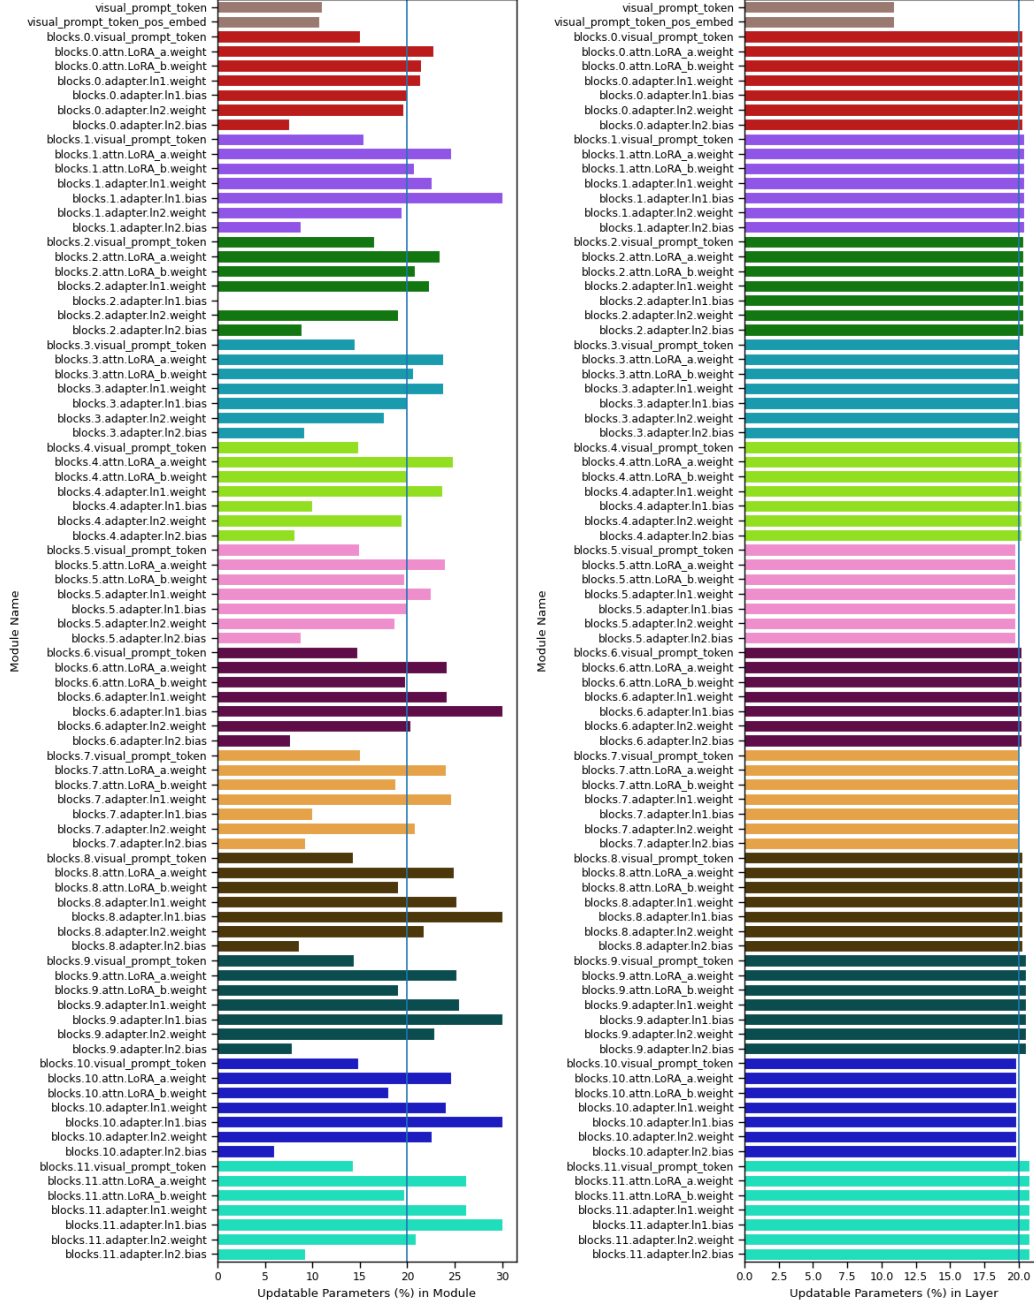

Figure 21: Sparsity pattern of attached modules to ViT-B/16 on caltech101. (Left) Module-wise updatable parameters (%) and (Right) Layer-wise updatable parameters (%). The BayesTune’s optimal sparsity level  $p^* = 20\%$  is shown as vertical line.

dtd

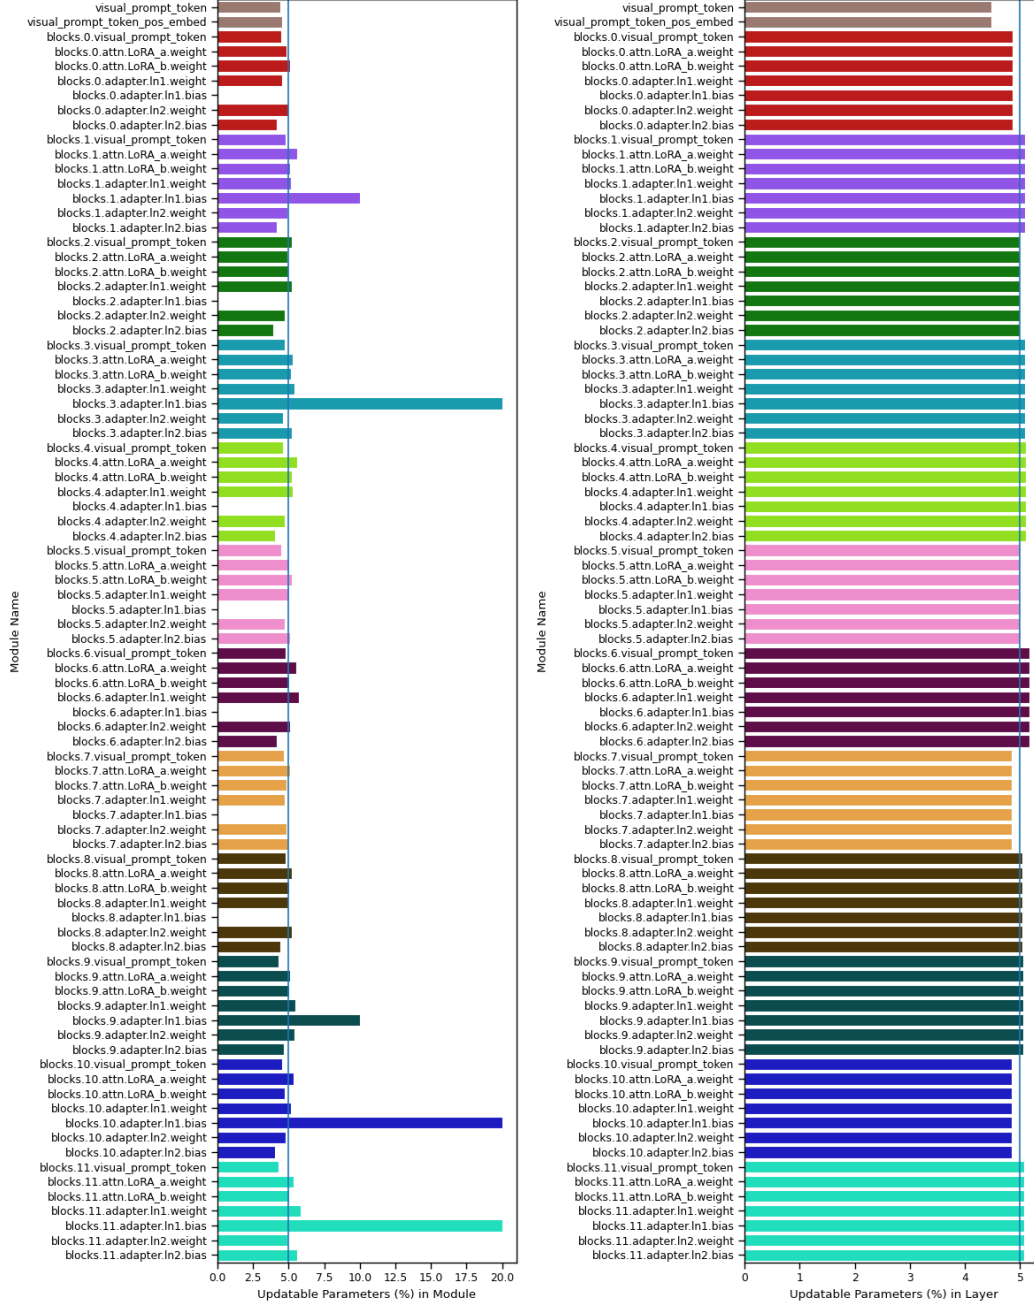

Figure 22: Sparsity pattern of attached modules to ViT-B/16 on dtd. (Left) Module-wise updatable parameters (%) and (Right) Layer-wise updatable parameters (%). The BayesTune’s optimal sparsity level  $p^* = 5\%$  is shown as vertical line.

# flower102

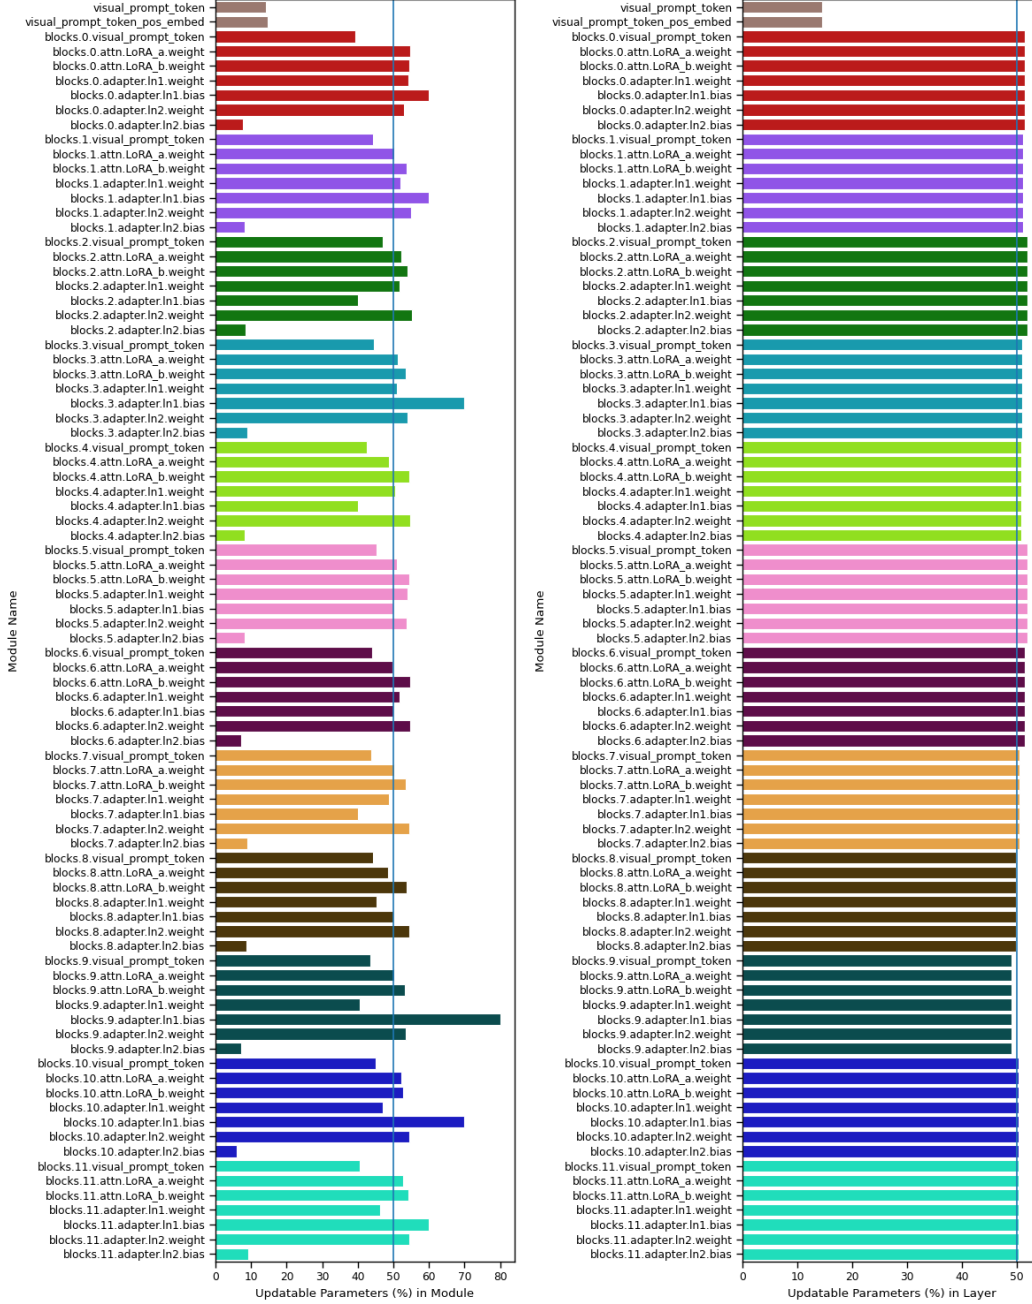

Figure 23: Sparsity pattern of attached modules to ViT-B/16 on flower102. (Left) Module-wise updatable parameters (%) and (Right) Layer-wise updatable parameters (%). The BayesTune’s optimal sparsity level  $p^* = 50\%$  is shown as vertical line.

# pets

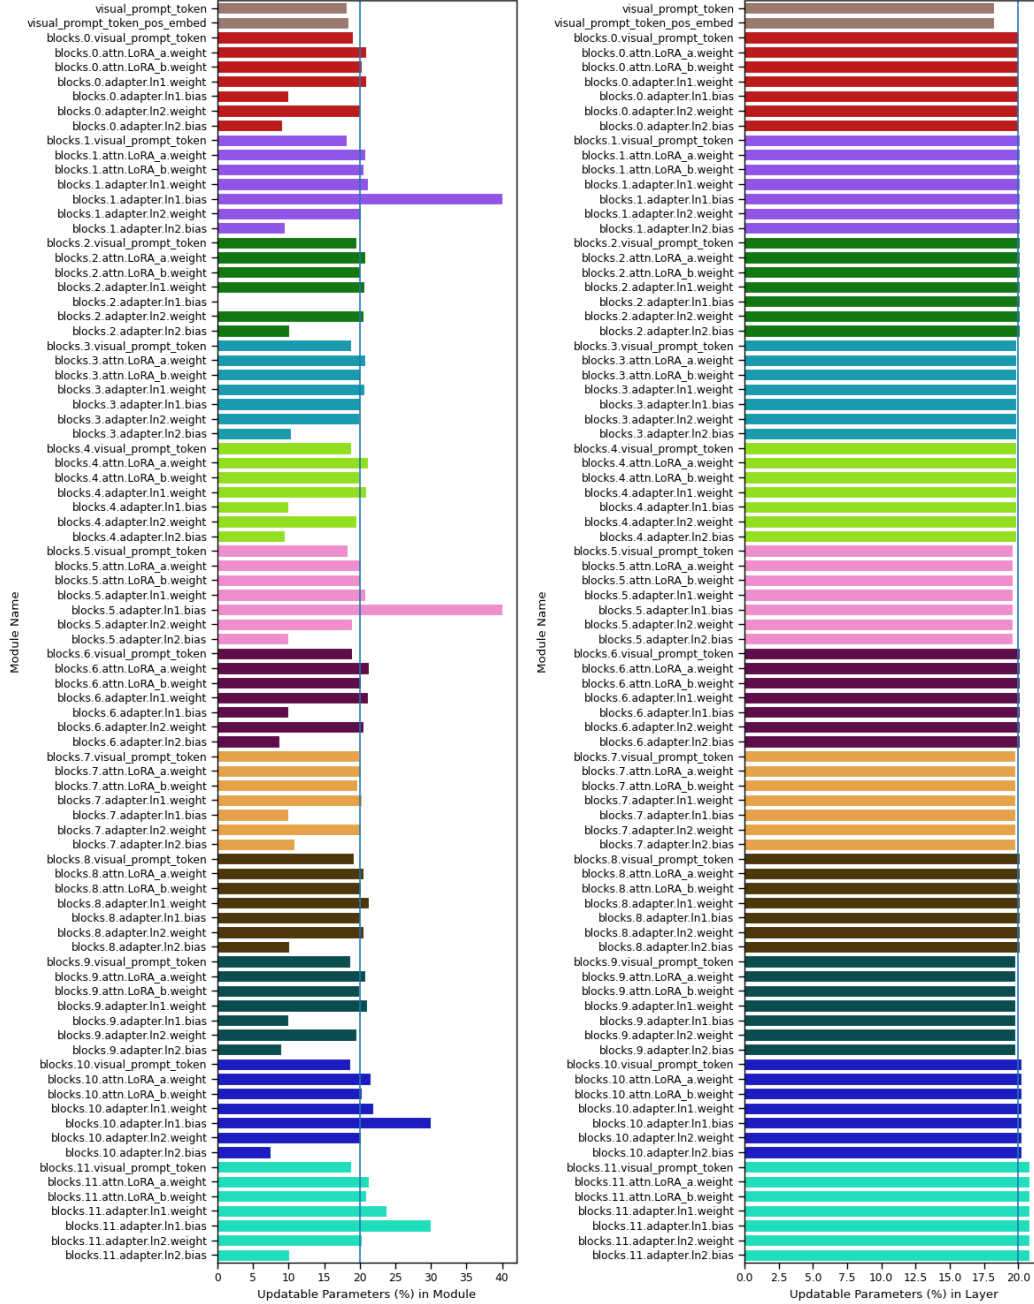

Figure 24: Sparsity pattern of attached modules to ViT-B/16 on pets. (Left) Module-wise updatable parameters (%) and (Right) Layer-wise updatable parameters (%). The BayesTune’s optimal sparsity level  $p^* = 20\%$  is shown as vertical line.

svhn

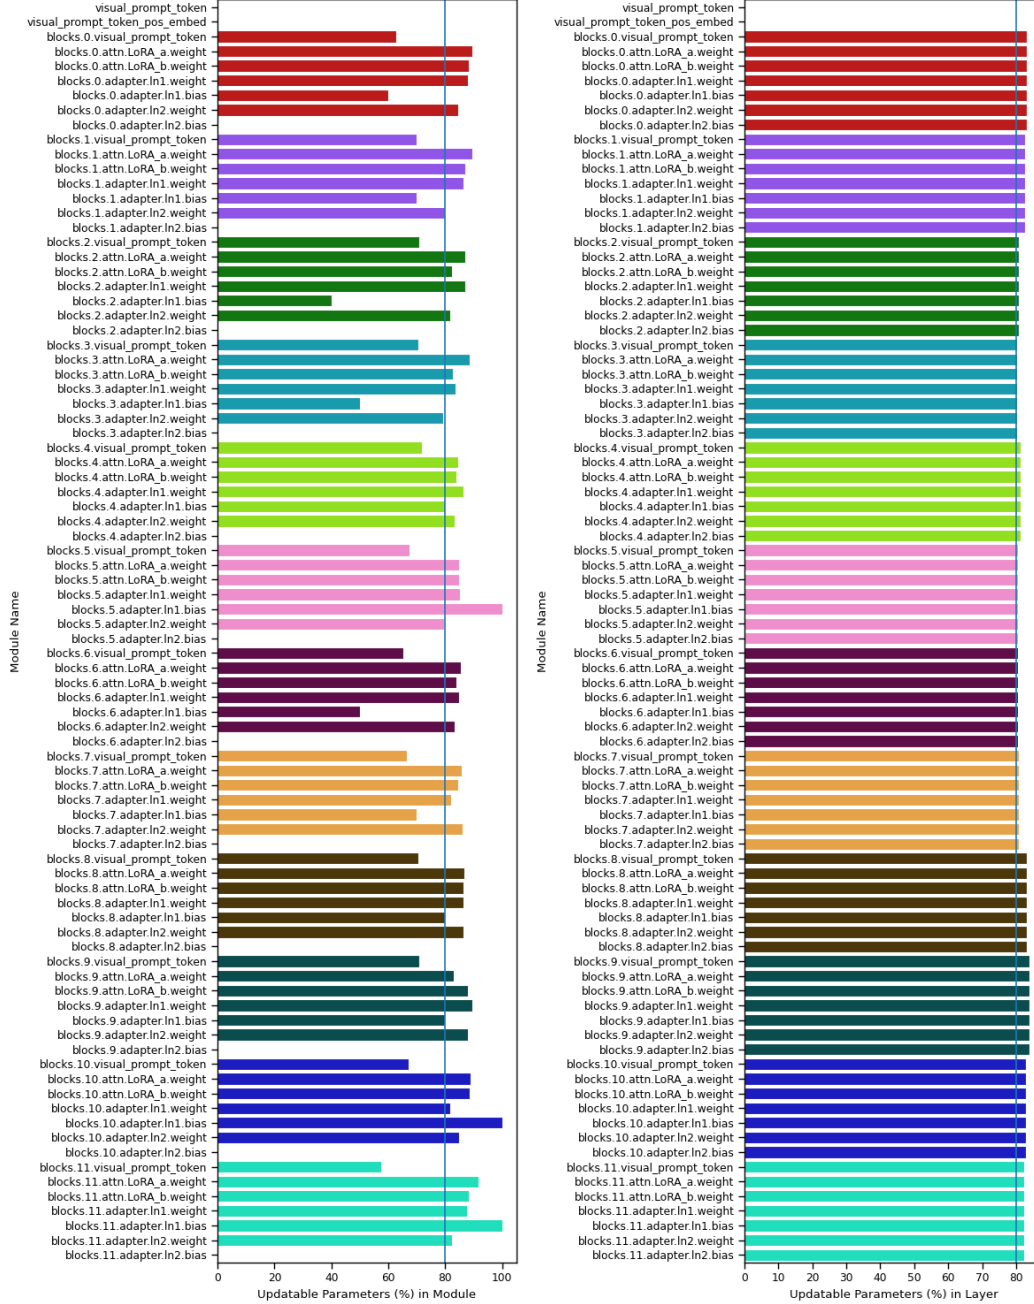

Figure 25: Sparsity pattern of attached modules to ViT-B/16 on svhn. (Left) Module-wise updatable parameters (%) and (Right) Layer-wise updatable parameters (%). The BayesTune’s optimal sparsity level  $p^* = 80\%$  is shown as vertical line.



sun397

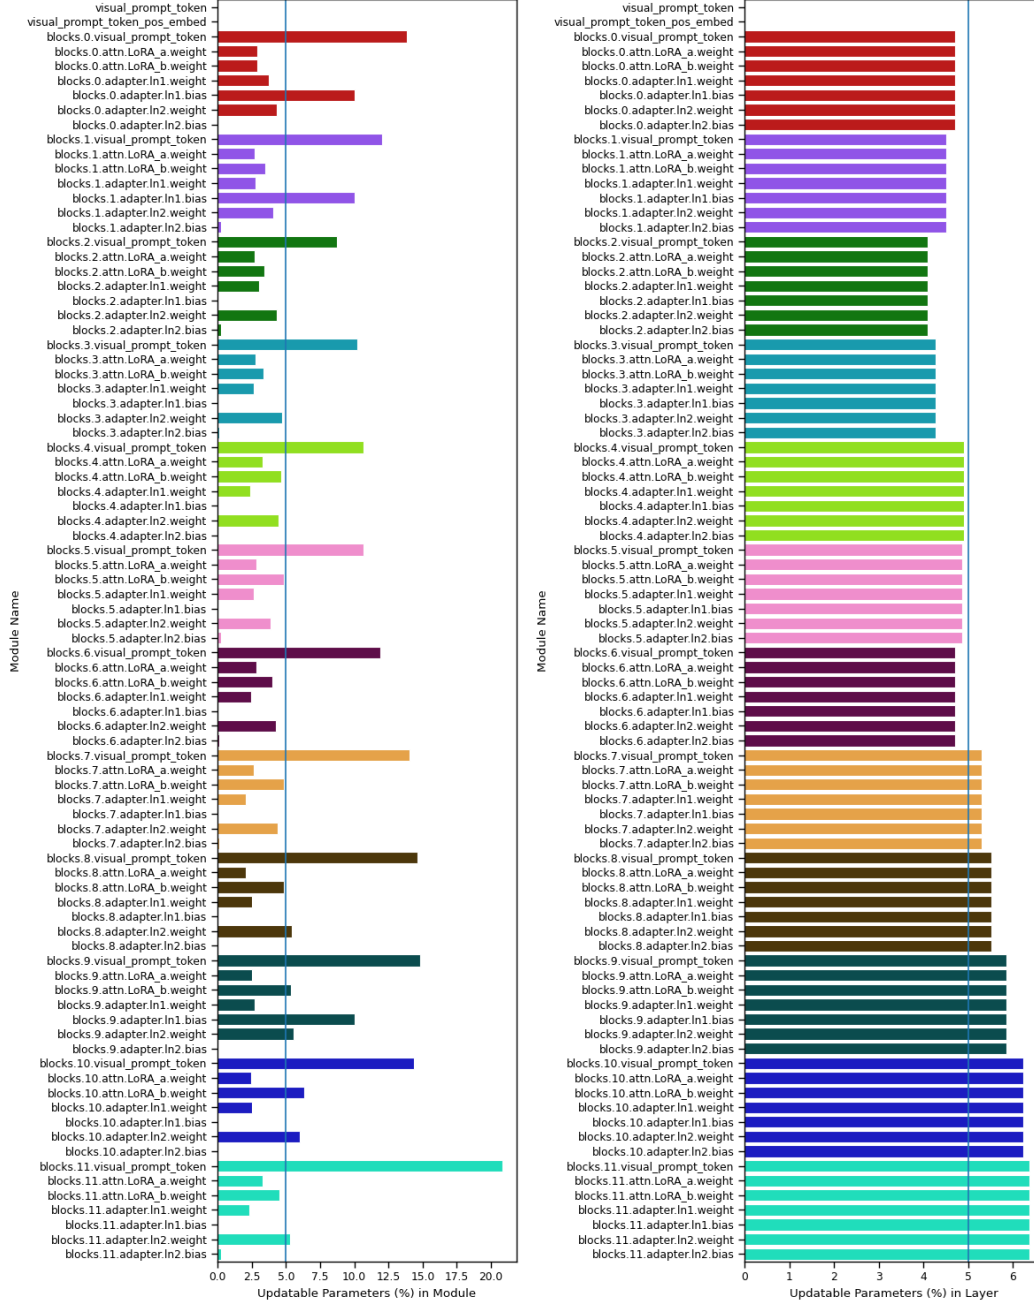

Figure 26: Sparsity pattern of attached modules to ViT-B/16 on sun397. (Left) Module-wise updatable parameters (%) and (Right) Layer-wise updatable parameters (%). The BayesTune’s optimal sparsity level  $p^* = 5\%$  is shown as vertical line.

# camelyon

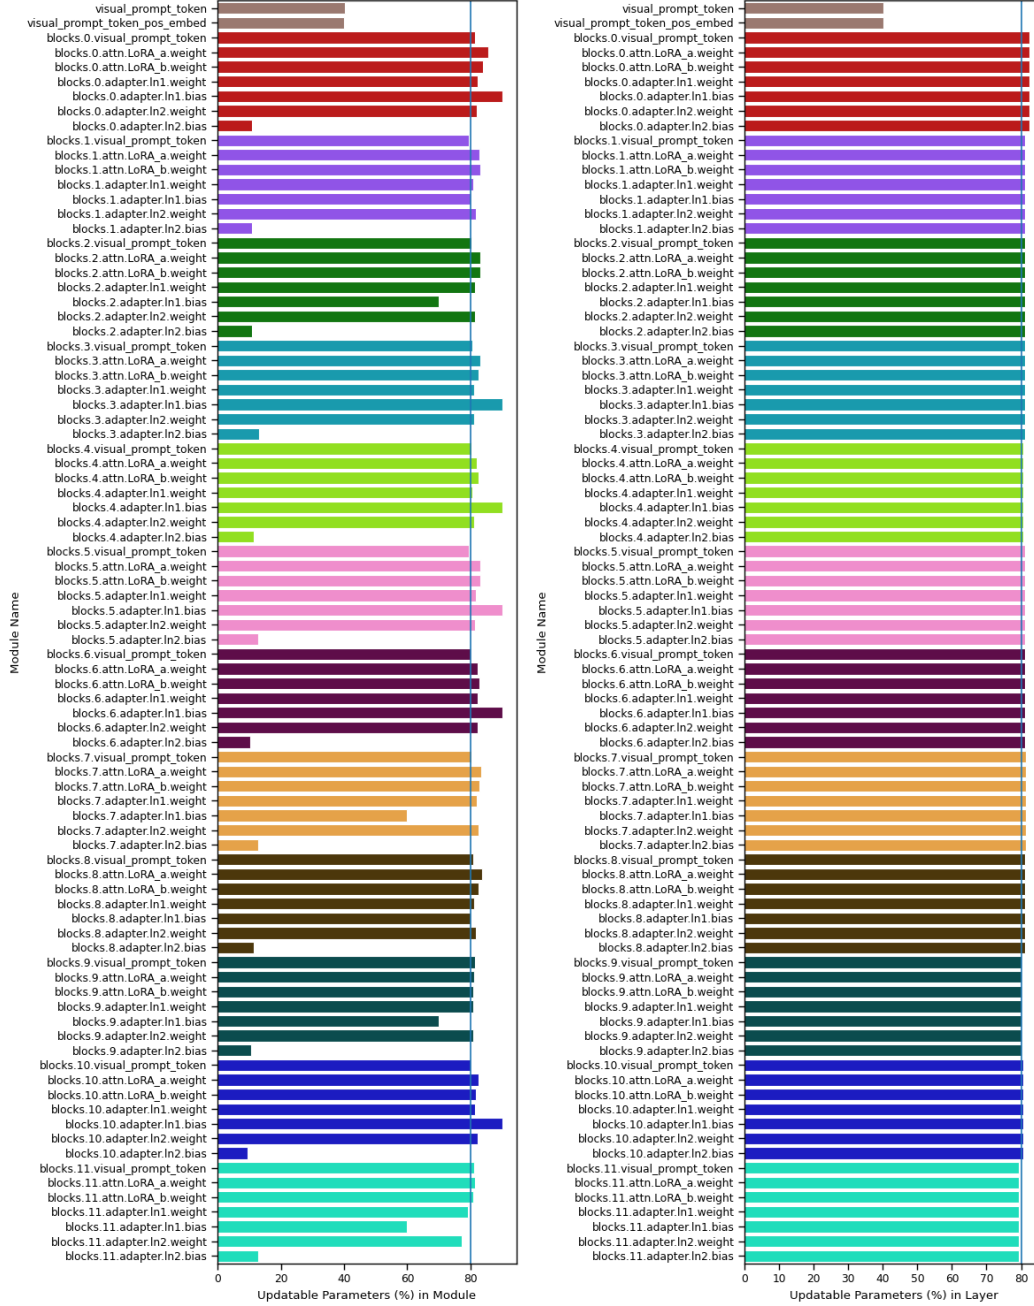

Figure 27: Sparsity pattern of attached modules to ViT-B/16 on camelyon. (Left) Module-wise updatable parameters (%) and (Right) Layer-wise updatable parameters (%). The BayesTune’s optimal sparsity level  $p^* = 80\%$  is shown as vertical line.

# eurosat

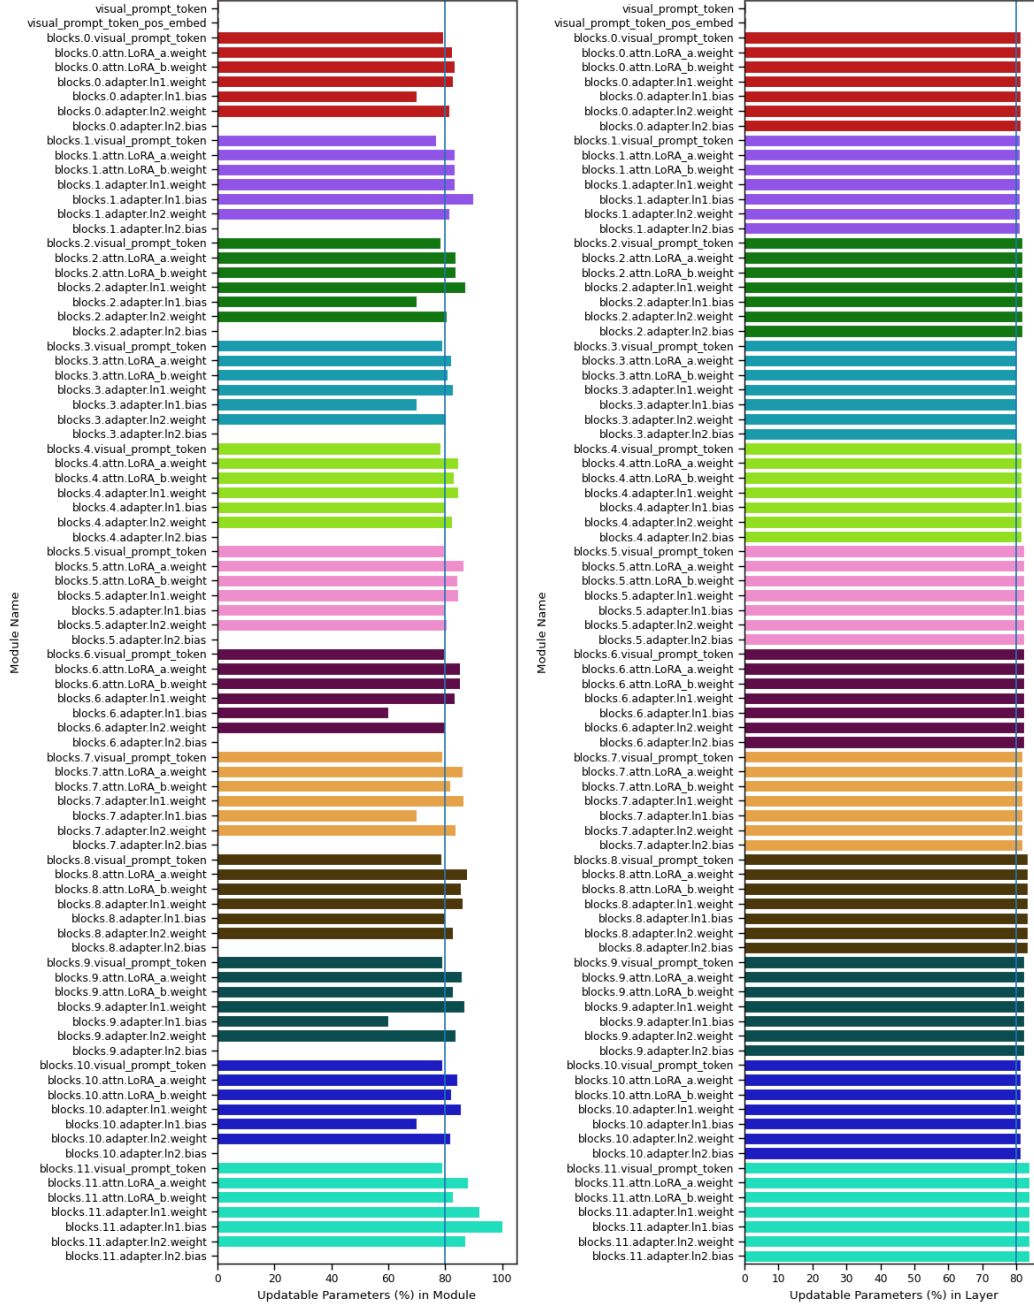

Figure 28: Sparsity pattern of attached modules to ViT-B/16 on eurosat. (Left) Module-wise updatable parameters (%) and (Right) Layer-wise updatable parameters (%). The BayesTune’s optimal sparsity level  $p^* = 80\%$  is shown as vertical line.

resisc45

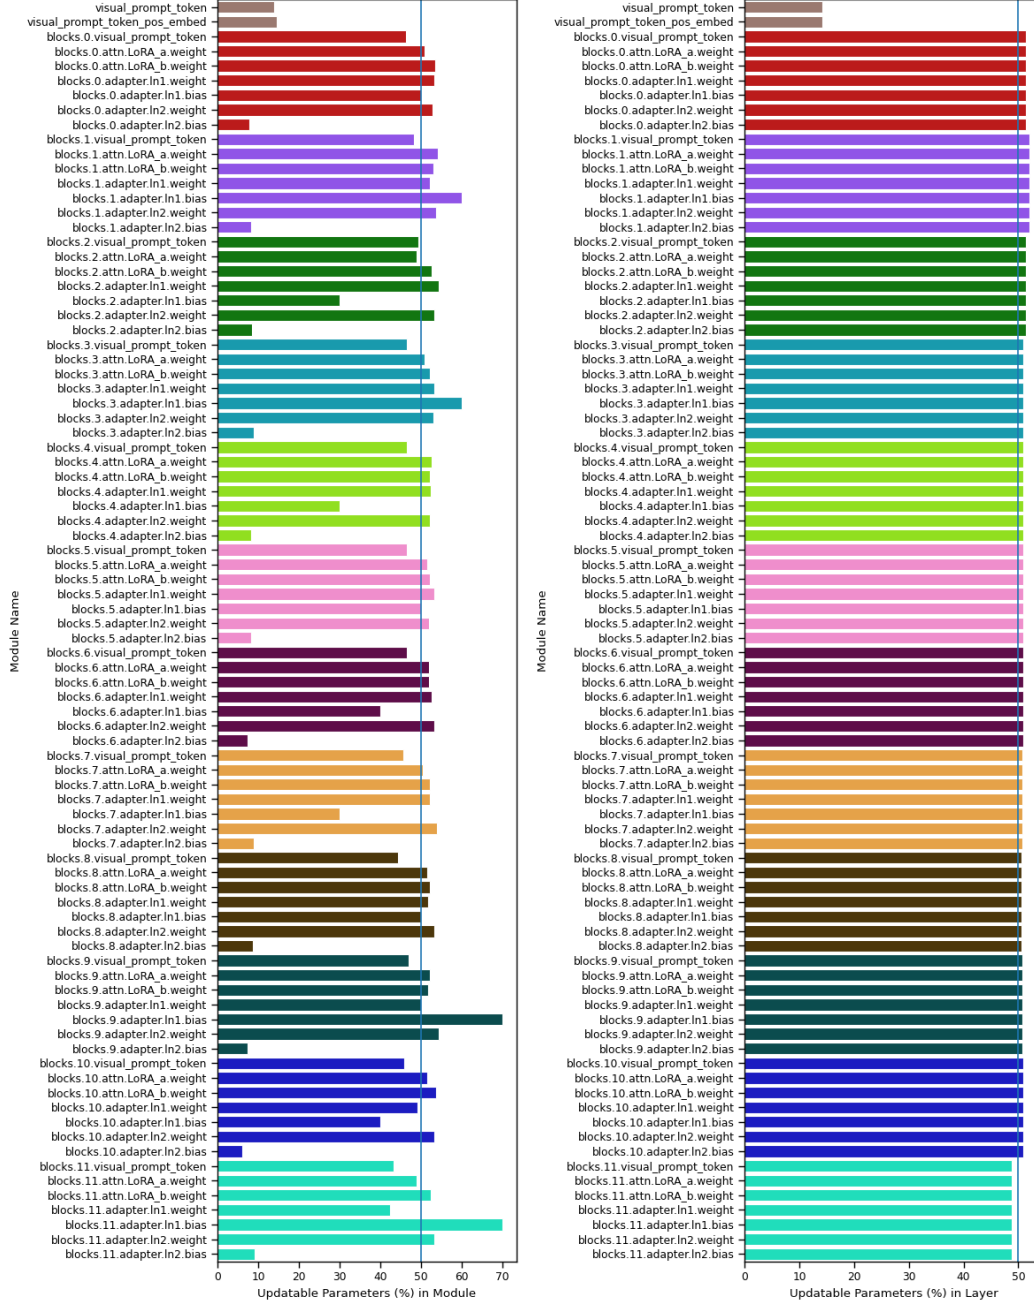

Figure 29: Sparsity pattern of attached modules to ViT-B/16 on resisc45. (Left) Module-wise updatable parameters (%) and (Right) Layer-wise updatable parameters (%). The BayesTune’s optimal sparsity level  $p^* = 50\%$  is shown as vertical line.

## retinopathy

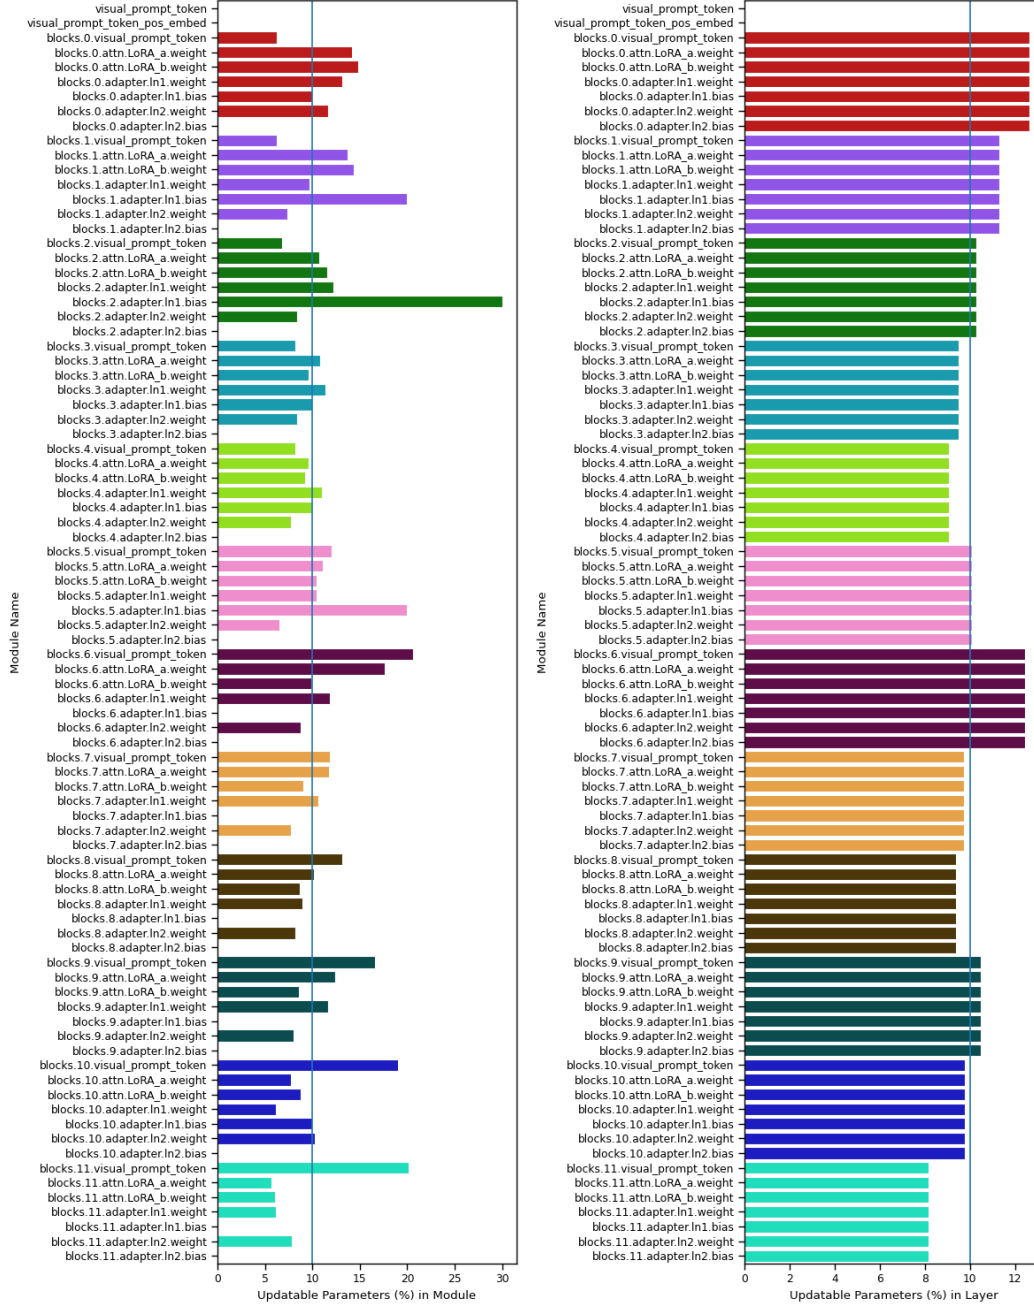

Figure 30: Sparsity pattern of attached modules to ViT-B/16 on retinopathy. (Left) Module-wise updatable parameters (%) and (Right) Layer-wise updatable parameters (%). The BayesTune’s optimal sparsity level  $p^* = 10\%$  is shown as vertical line.



# clever-count

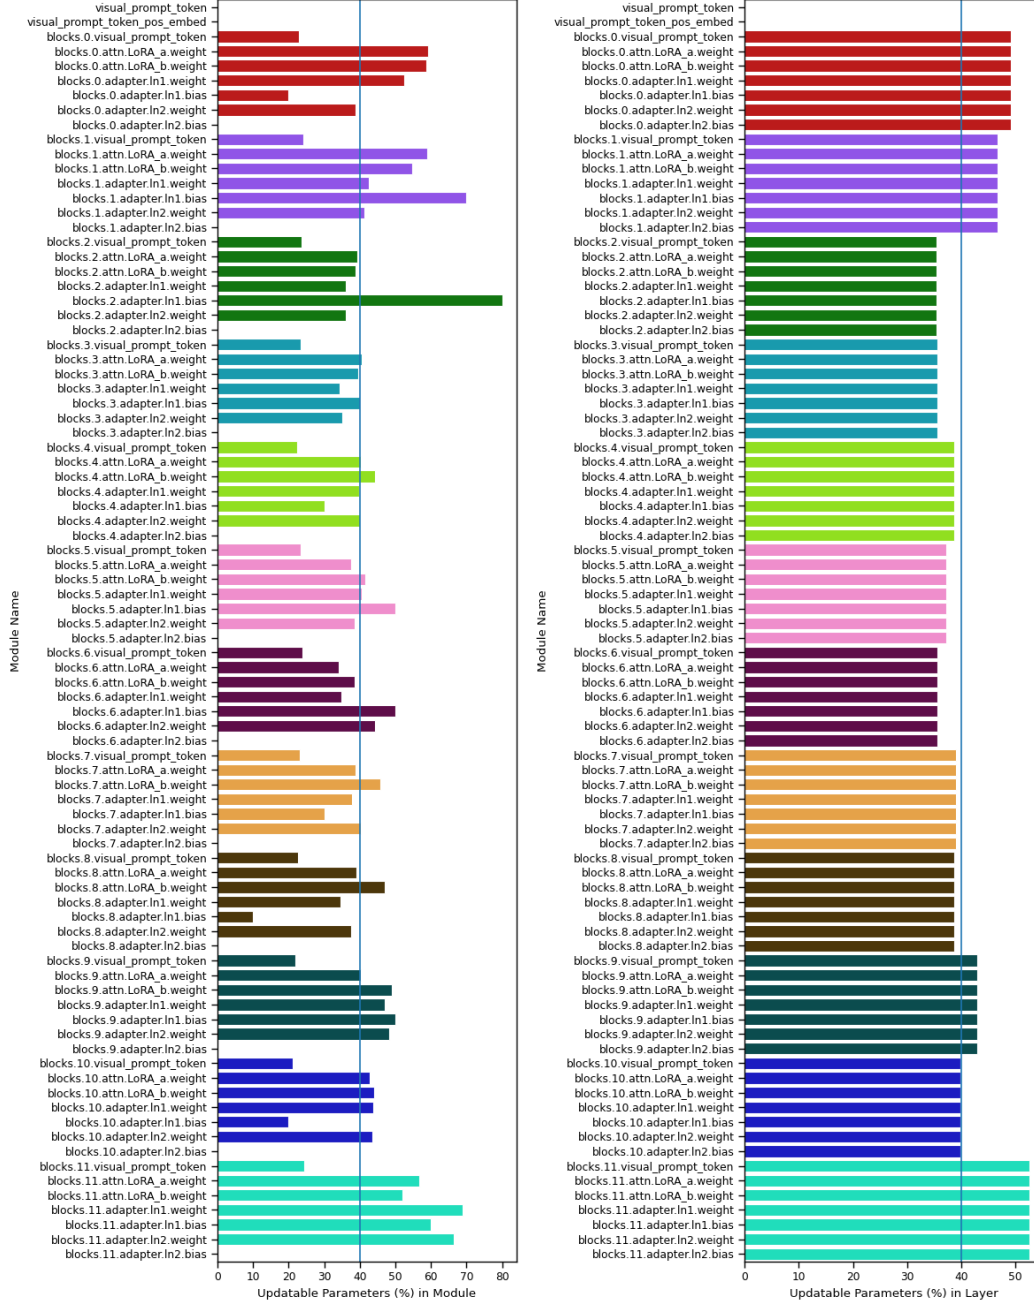

Figure 31: Sparsity pattern of attached modules to ViT-B/16 on clever-count. (Left) Module-wise updatable parameters (%) and (Right) Layer-wise updatable parameters (%). The BayesTune’s optimal sparsity level  $p^* = 40\%$  is shown as vertical line.

# clever-dist

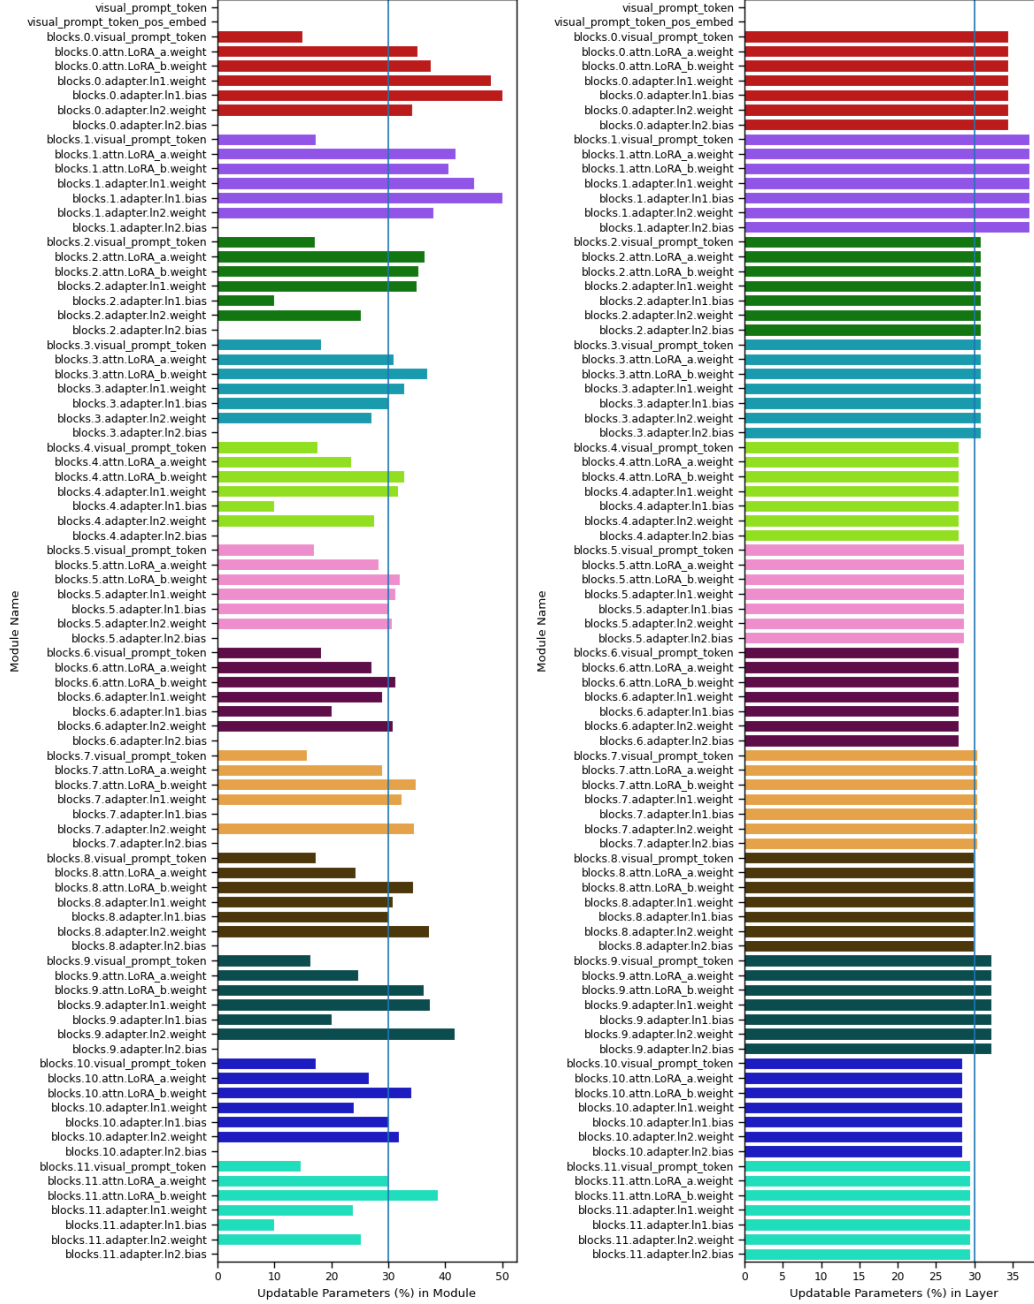

Figure 32: Sparsity pattern of attached modules to ViT-B/16 on clever-dist. (Left) Module-wise updatable parameters (%) and (Right) Layer-wise updatable parameters (%). The BayesTune’s optimal sparsity level  $p^* = 30\%$  is shown as vertical line.

dmlab

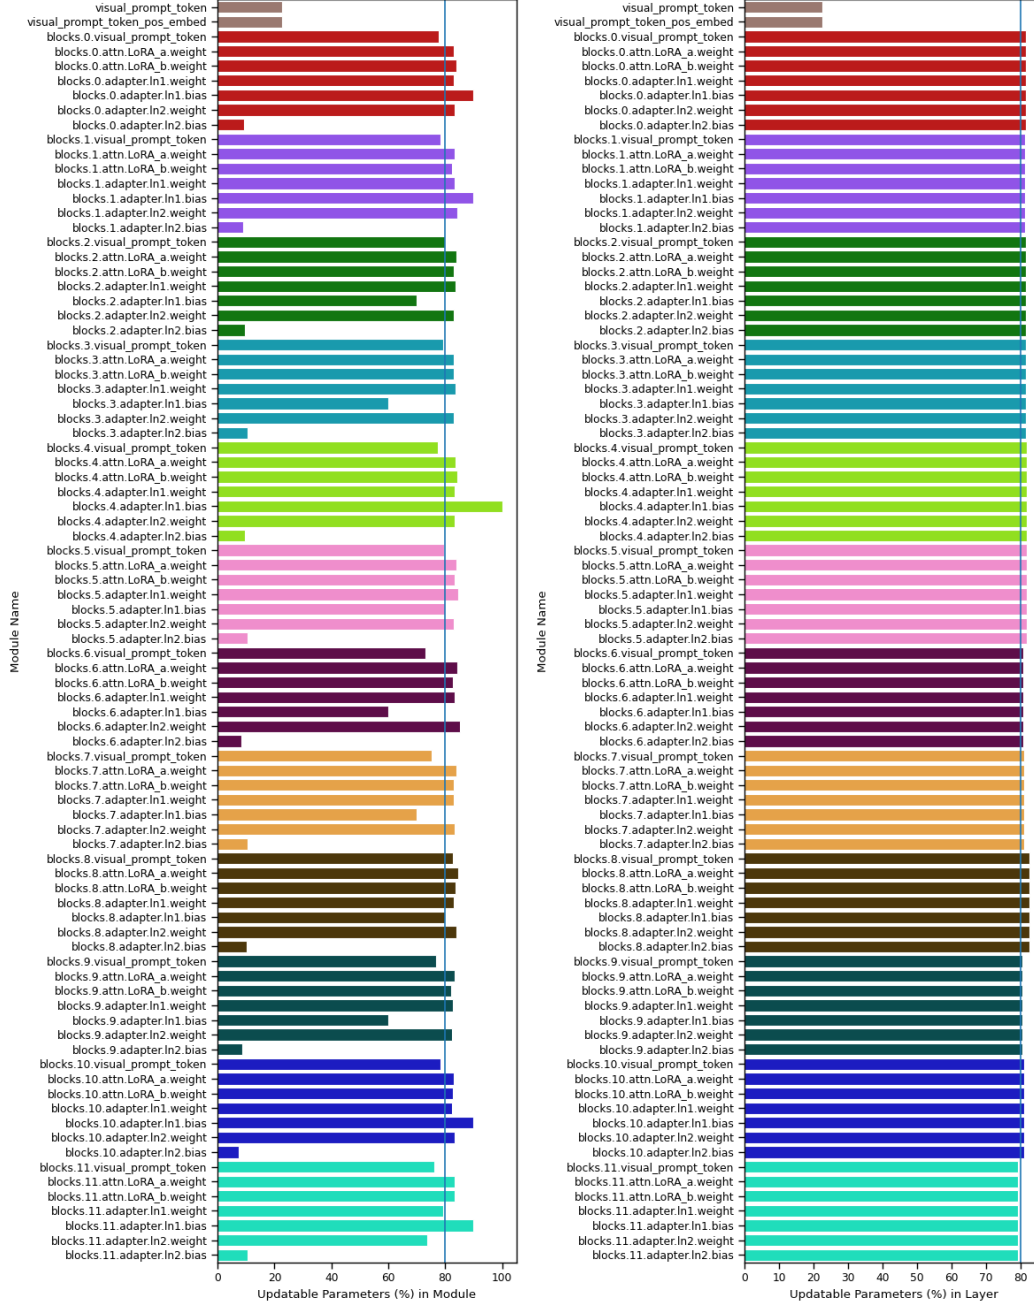

Figure 33: Sparsity pattern of attached modules to ViT-B/16 on dmlab. (Left) Module-wise updatable parameters (%) and (Right) Layer-wise updatable parameters (%). The BayesTune’s optimal sparsity level  $p^* = 80\%$  is shown as vertical line.

# kitti

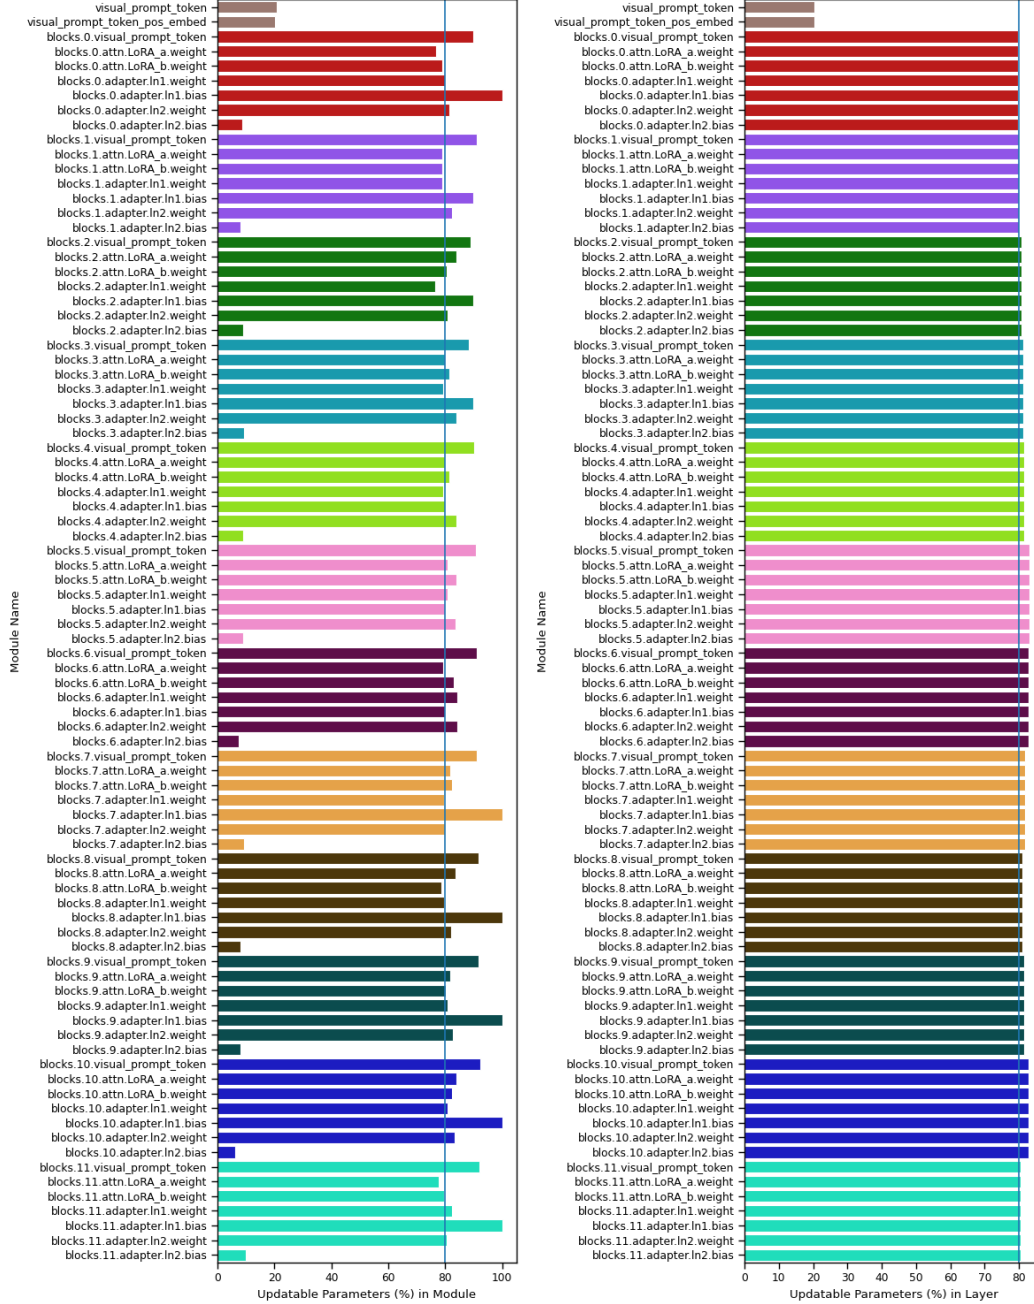

Figure 34: Sparsity pattern of attached modules to ViT-B/16 on kitti. (Left) Module-wise updatable parameters (%) and (Right) Layer-wise updatable parameters (%). The BayesTune’s optimal sparsity level  $p^* = 80\%$  is shown as vertical line.

## dsprite-loc

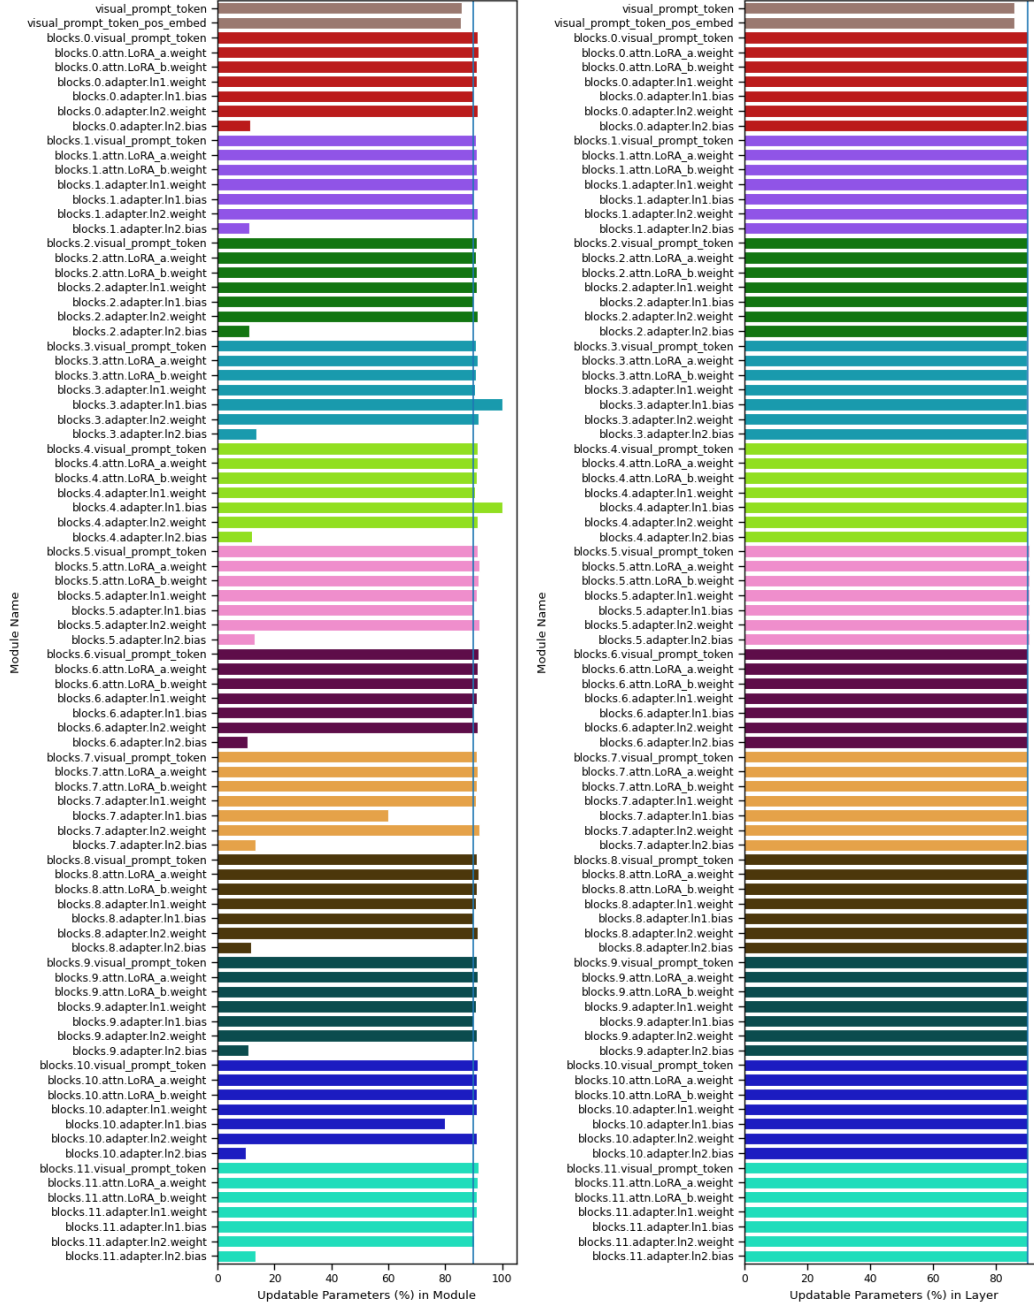

Figure 35: Sparsity pattern of attached modules to ViT-B/16 on dsprite-loc. (Left) Module-wise updatable parameters (%) and (Right) Layer-wise updatable parameters (%). The BayesTune’s optimal sparsity level  $p^* = 90\%$  is shown as vertical line.



# dsprite-ori

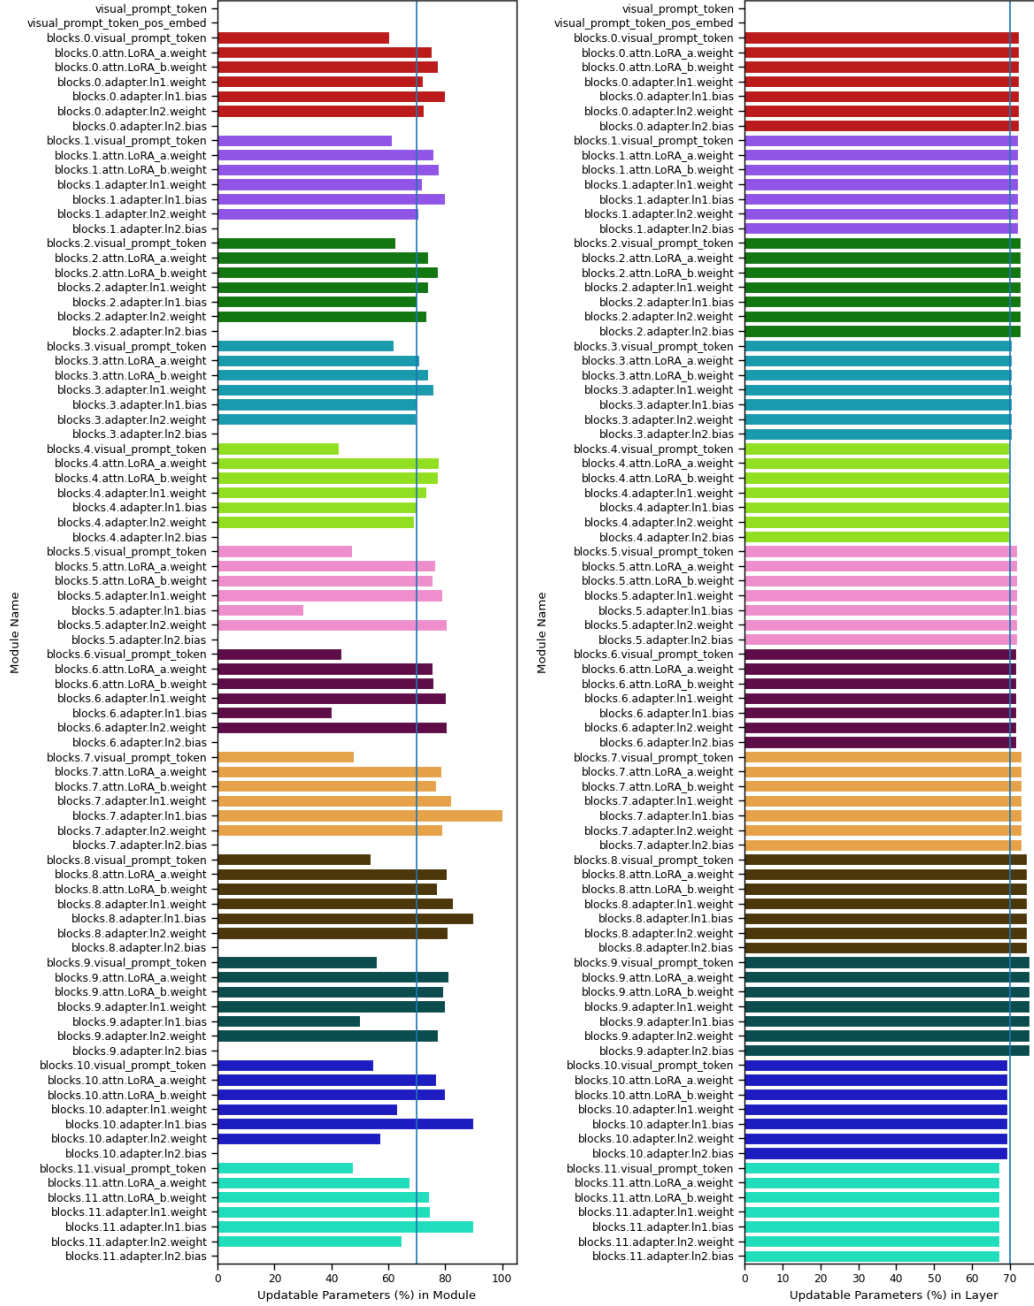

Figure 36: Sparsity pattern of attached modules to ViT-B/16 on dsprite-ori. (Left) Module-wise updatable parameters (%) and (Right) Layer-wise updatable parameters (%). The BayesTune’s optimal sparsity level  $p^* = 70\%$  is shown as vertical line.

# snorb-azim

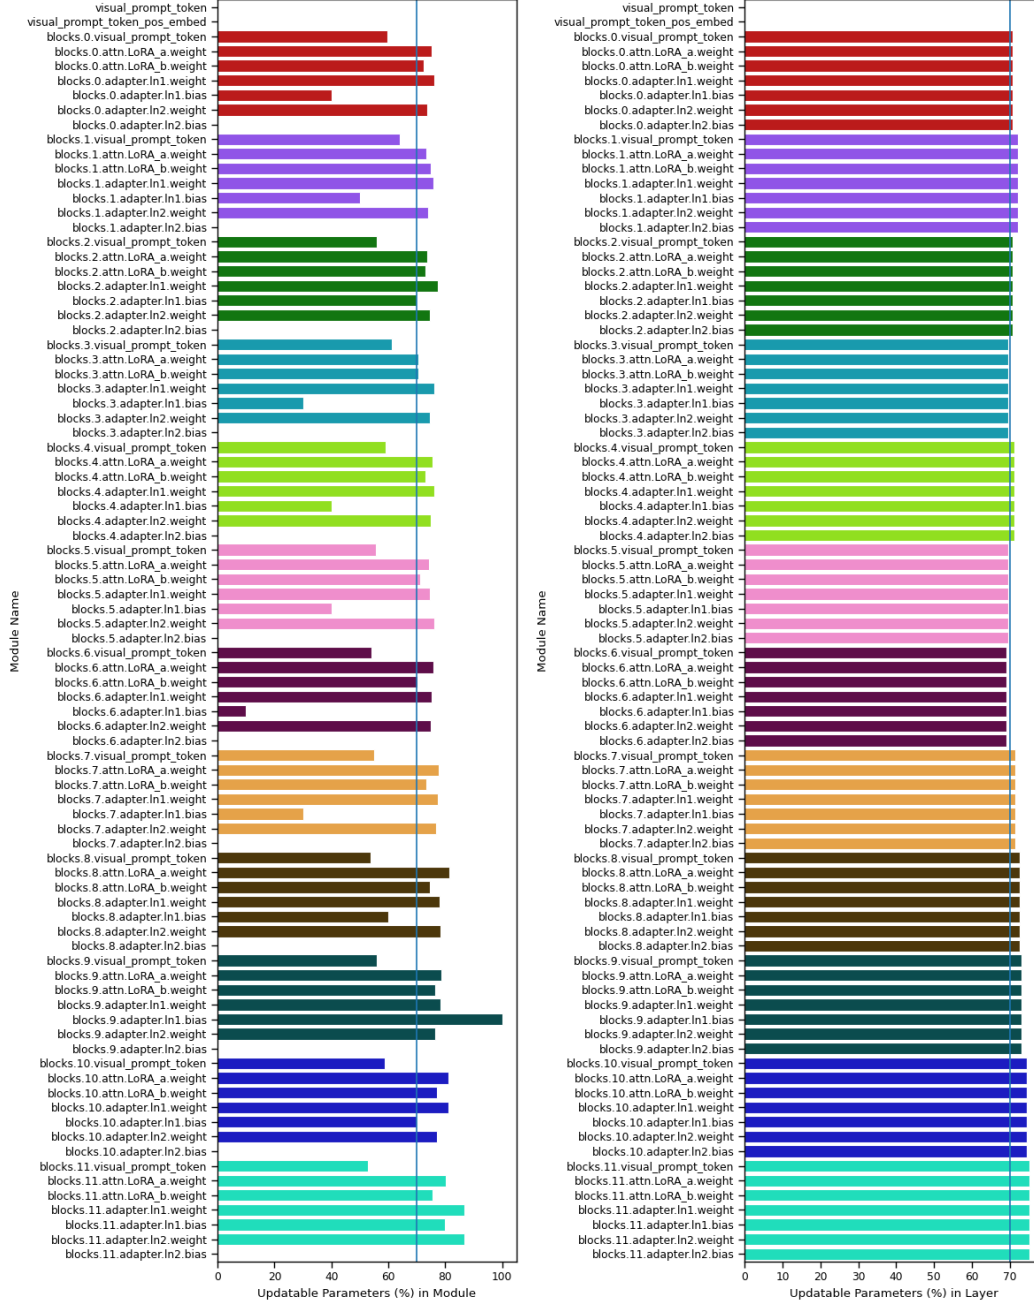

Figure 37: Sparsity pattern of attached modules to ViT-B/16 on snorb-azim. (Left) Module-wise updatable parameters (%) and (Right) Layer-wise updatable parameters (%). The BayesTune’s optimal sparsity level  $p^* = 70\%$  is shown as vertical line.

# snorb-ele

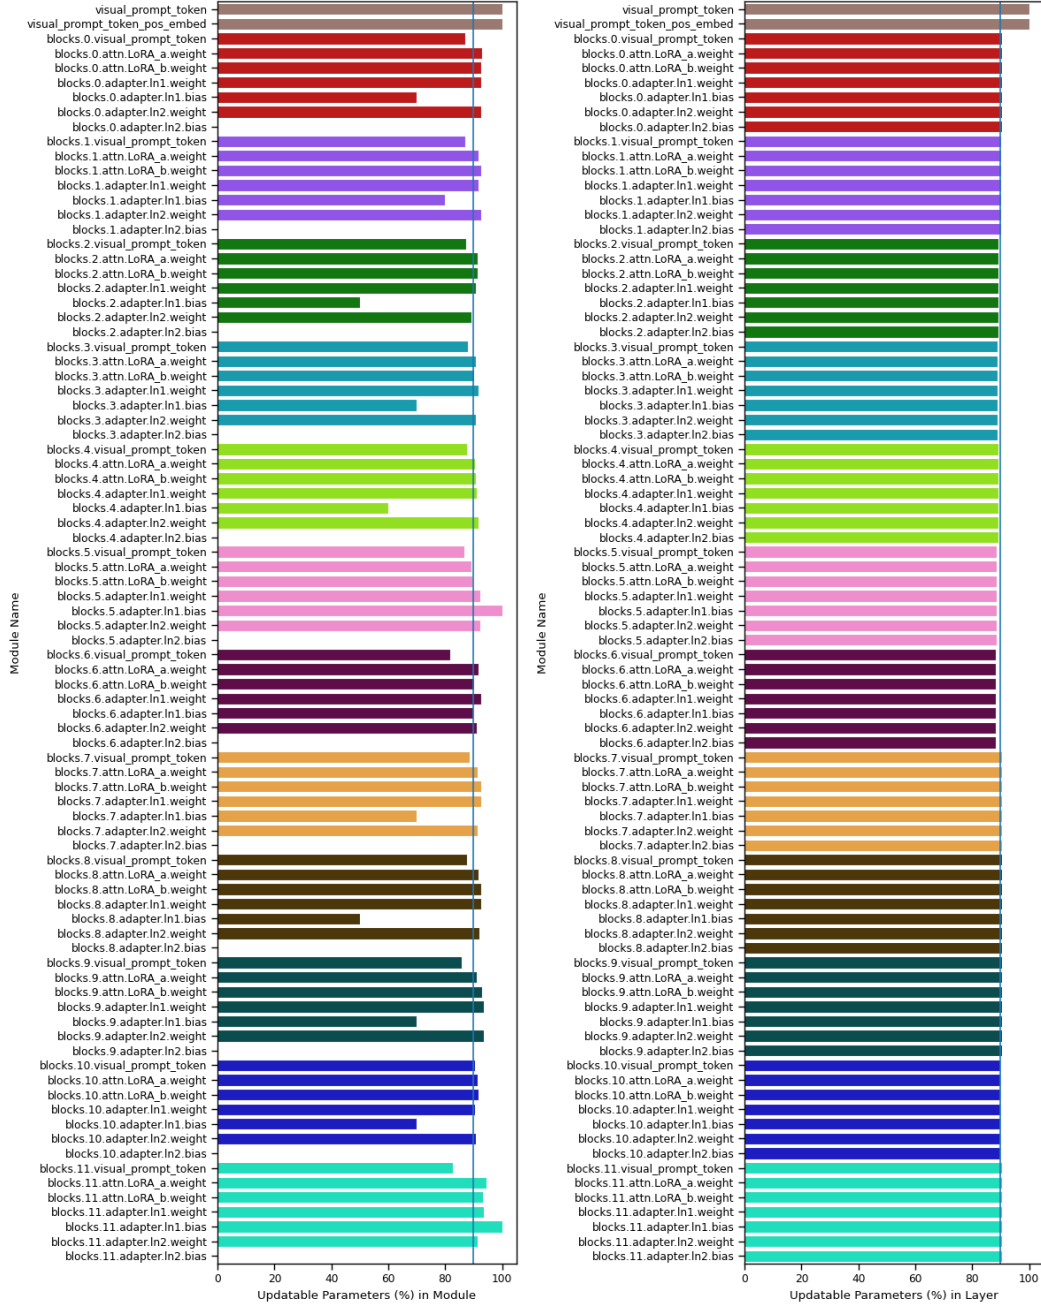

Figure 38: Sparsity pattern of attached modules to ViT-B/16 on snorb-ele. (Left) Module-wise updatable parameters (%) and (Right) Layer-wise updatable parameters (%). The BayesTune’s optimal sparsity level  $p^* = 90\%$  is shown as vertical line.
